# Supplementary material
Source: PubMed Central journal article supplement (PMC4371114)
Supplement: mmc1.pdf [file mmc1.pdf]

Date \_\_\_\_\_  
 Name 1 Sex F  
 Address \_\_\_\_\_  
 Telephone \_\_\_\_\_  
 Date of Birth \_\_\_\_\_ Age 30  
 Referral: GP / Orth / Self / Other  
 Work Groom: riding, mucking out stables  
 Leisure \_\_\_\_\_  
 Postures / Stresses Bending, lifting, use of arm++  
 Functional Disability from present episode Limited work  
 Functional Disability score \_\_\_\_\_  
 VAS Score (0-10) 6-8

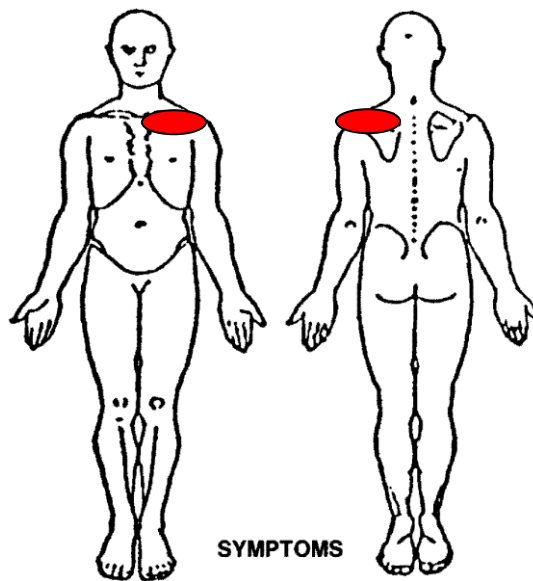

HISTORY

Present Symptoms Constant ache left shoulder  
 Present since 7 weeks *Improving / **Unchanging** / Worsening*  
 Commenced as a result of Fell off horse *or no apparent reason*  
 Symptoms at onset: Immediate shoulder pain  
 Constant symptoms: Left shoulder Intermittent symptoms: \_\_\_\_\_  
 What produces or worsens Using arm  
 \_\_\_\_\_  
 What stops or reduces Limiting work reduces pain

Continued use makes the pain Better Worse No Effect

Pain at rest Yes / No

Disturbed night Yes / No

Other Questions \_\_\_\_\_

Treatments this episode None

Previous episodes None

Previous treatments None

Spinal history None

Paraesthesia Yes / No

Medications tried NSAIDs Effect No effect

Present medication Nil else

General health Good

Imaging None

Summary: Acute / **Sub-acute** / Chronic **Trauma** / Insidious onset

Sites for physical examination Neck / Shoulder

EXAMINATION

Observation Poor cervical posture

Baseline measurements (pain or functional activity) Left shoulder pain

| Active Movements (note symptoms and range)                      | PDM | ERP |
|-----------------------------------------------------------------|-----|-----|
| <u>Reduced medial rotation - pain ++</u>                        | √   |     |
|                                                                 |     |     |
|                                                                 |     |     |
| Passive Movement (+/- over pressure) (note symptoms and range): |     |     |
| <u>Medial rotation</u>                                          | √   |     |
|                                                                 |     |     |
|                                                                 |     |     |
| Resisted Test Response (pain)                                   |     |     |
| <u>All increased pain</u>                                       |     |     |
|                                                                 |     |     |
|                                                                 |     |     |

Repeated Tests (choose the most symptomatic from above)

| Baseline symptoms                                  | Symptoms response                                          |                                            | Mechanical Response |      |           |
|----------------------------------------------------|------------------------------------------------------------|--------------------------------------------|---------------------|------|-----------|
|                                                    | During Movement – Produce, Abolish, Increase, Decrease, NE | After Movement – Better, Worse, NB, NW, NE | ↑ROM                | ↓ROM | No Effect |
| Active movement, passive movement, resisted test   |                                                            |                                            |                     |      |           |
| Medial rotation                                    | ↑                                                          | NW                                         |                     |      | √         |
| Lateral rotation                                   | ↑                                                          | NW                                         |                     |      | √         |
| Flexion                                            | ↑                                                          | NW                                         |                     |      | √         |
| Extension                                          | ↑                                                          | NW                                         |                     |      | √         |
| Abduction                                          | ↑                                                          | NW                                         |                     |      | √         |
| Effect of static positioning                       |                                                            |                                            |                     |      |           |
|                                                    |                                                            |                                            |                     |      |           |
| Other tests: eg loaded, compression, unloaded etc. |                                                            |                                            |                     |      |           |
|                                                    |                                                            |                                            |                     |      |           |

SPINE

Movement Loss Retraction / extension

Effect of repeated movements ↑ shoulder ROM; ↓ shoulder pain Better

Effect of static positioning \_\_\_\_\_

Spine testing Not relevant / relevant / secondary problem

| PROVISIONAL CLASSIFICATION | Peripheral | Spine             |
|----------------------------|------------|-------------------|
| Dysfunction – Articular    | _____      | Contractile _____ |
| Derangement                | _____      | Postural _____    |
| Other                      | _____      | Uncertain _____   |

PRINCIPLE OF MANAGEMENT

Education \_\_\_\_\_

Exercise \_\_\_\_\_ Frequency \_\_\_\_\_

Treatment Goals \_\_\_\_\_

\_\_\_\_\_

Date \_\_\_\_\_  
 Name 2 Sex M  
 Address \_\_\_\_\_  
 Telephone \_\_\_\_\_  
 Date of Birth \_\_\_\_\_ Age 15  
 Referral: *GP / Orth / **Self** / Other* \_\_\_\_\_  
 Work School  
 Leisure Football  
 Postures / Stresses Sitting, walking, running  
 Functional Disability from present episode Stopped football  
 Functional Disability score \_\_\_\_\_  
 VAS Score (0-10) 5

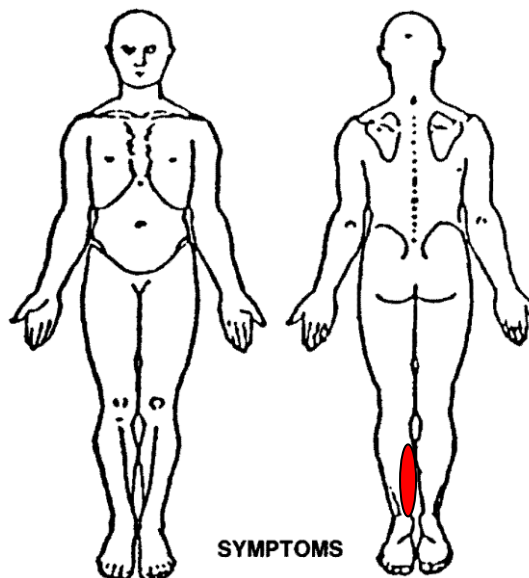

HISTORY

Present Symptoms Left ankle heel pain  
 Present since 1 year *Improving / **Unchanging** / Worsening*  
 Commenced as a result of \_\_\_\_\_ ***no apparent reason***  
 Symptoms at onset: Ankle / heel  
 Constant symptoms: \_\_\_\_\_ Intermittent symptoms: All  
 What produces or worsens Running, stairs, football, walking > 5 minutes  
 \_\_\_\_\_  
 What stops or reduces Rest

Continued use makes the pain Better **Worse** No Effect

Pain at rest Yes / **No**

Disturbed night Yes / **No**

Other Questions \_\_\_\_\_  
Very flat feet

Treatments this episode None

Previous episodes None

Previous treatments None

Spinal history None

Paraesthesia Yes / **No**

Medications tried None Effect \_\_\_\_\_

Present medication None

General health Good

Imaging No

Summary: *Acute / Sub-acute / **Chronic*** *Trauma / **Insidious onset***

Sites for physical examination Ankle / heel

EXAMINATION

Observation Nothing abnormal detected (NAD)

Baseline measurements (pain or functional activity) None

| Active Movements (note symptoms and range)                      | PDM | ERP |
|-----------------------------------------------------------------|-----|-----|
| Plantarflexion                                                  | √   |     |
| Dorsiflexion                                                    |     | √   |
| Passive Movement (+/- over pressure) (note symptoms and range): |     |     |
| Dorsiflexion                                                    |     | √   |
| Resisted Test Response (pain)                                   |     |     |
| Plantarflexion <u>Produced pain ++</u>                          |     |     |

Repeated Tests (choose the most symptomatic from above) Ankle / heel pain

| Baseline symptoms                                  | Symptoms response                                          |                                            | Mechanical Response |      |           |
|----------------------------------------------------|------------------------------------------------------------|--------------------------------------------|---------------------|------|-----------|
|                                                    |                                                            |                                            | ↑ROM                | ↓ROM | No Effect |
| Active movement, passive movement, resisted test   | During Movement – Produce, Abolish, Increase, Decrease, NE | After Movement – Better, Worse, NB, NW, NE |                     |      |           |
| Resisted plantarflexion                            | ↑                                                          | NW                                         |                     |      | √         |
| Effect of static positioning                       |                                                            |                                            |                     |      |           |
| Other tests: eg loaded, compression, unloaded etc. |                                                            |                                            |                     |      |           |

SPINE

Movement Loss None

Effect of repeated movements NE

Effect of static positioning NE

Spine testing Not relevant / relevant / secondary

| PROVISIONAL CLASSIFICATION | Peripheral | Spine       |
|----------------------------|------------|-------------|
| Dysfunction – Articular    |            | Contractile |
| Derangement                |            | Postural    |
| Other                      |            | Uncertain   |

PRINCIPLE OF MANAGEMENT

Education \_\_\_\_\_

Exercise \_\_\_\_\_ Frequency \_\_\_\_\_

Treatment Goals \_\_\_\_\_

Date \_\_\_\_\_  
 Name 3 Sex F  
 Address \_\_\_\_\_  
 Telephone \_\_\_\_\_  
 Date of Birth \_\_\_\_\_ Age 32  
 Referral: *GP / Orth / **Self** / Other* \_\_\_\_\_  
 Work Aerobics instructor  
 Leisure Active  
 Postures / Stresses \_\_\_\_\_  
 Functional Disability from present episode Stopped class  
 Functional Disability score \_\_\_\_\_  
 VAS Score (0-10) 6-8

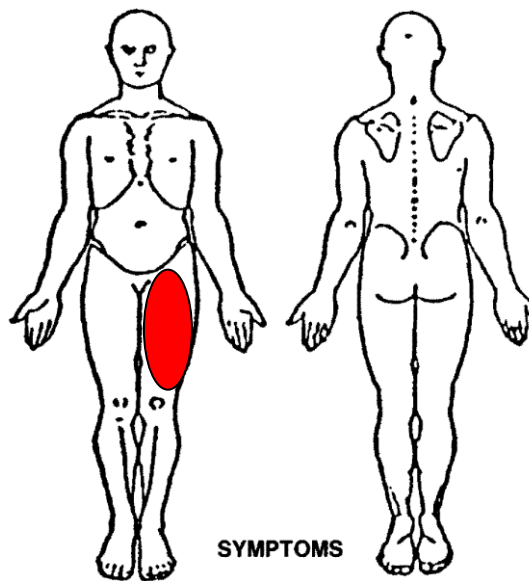

HISTORY

Present Symptoms Left thigh  
 Present since 6 months *Improving / Unchanging / **Worsening***  
 Commenced as a result of After running? ***no apparent reason***  
 Symptoms at onset: Left thigh  
 Constant symptoms: Left thigh Intermittent symptoms: \_\_\_\_\_  
 What produces or worsens Prolonged sitting, stairs, running on spot, jumping  
 What stops or reduces Sitting with legs supported on bed / chair

Continued use makes the pain Better **Worse** No Effect  
 Pain at rest **Yes** / No  
 Disturbed night **Yes** / No If on left side  
 Other Questions \_\_\_\_\_

Treatments this episode Iliotibial band and quads stretching, ultrasound - Worse after, pins + needles in foot  
 Previous episodes None  
 Previous treatments None  
 Spinal history Back pain episodes - advised leg-length inequality

Paraesthesia **Yes** / No

Medications tried None Effect \_\_\_\_\_  
 Present medication None  
 General health Good  
 Imaging None

Summary: *Acute / Sub-acute / **Chronic*** *Trauma / **Insidious onset***

Sites for physical examination Spine / hip / knee

EXAMINATION

Observation Stands left lateral shift

Baseline measurements (pain or functional activity) Left thigh pain (6/10)

| Active Movements (note symptoms and range)                         | PDM | ERP |
|--------------------------------------------------------------------|-----|-----|
| <u>Hip flexion, abduction, medial rotation - all reduced ROM</u>   | √   |     |
| <u>Knee - NAD</u>                                                  |     |     |
| Passive Movement (+/- over pressure) (note symptoms and range):    |     |     |
| <u>Hip - flexion, abduction, medial rotation - all reduced ROM</u> | √   |     |
| <u>NE knee</u>                                                     |     |     |
| Resisted Test Response (pain)                                      |     |     |
| <u>NE hip</u>                                                      |     |     |
| <u>NE knee</u>                                                     |     |     |

Repeated Tests (choose the most symptomatic from above) Left thigh pain

| Baseline symptoms                                  | Symptoms response                                          |                                            | Mechanical Response |      |           |
|----------------------------------------------------|------------------------------------------------------------|--------------------------------------------|---------------------|------|-----------|
|                                                    | During Movement – Produce, Abolish, Increase, Decrease, NE | After Movement – Better, Worse, NB, NW, NE | ↑ROM                | ↓ROM | No Effect |
| Active movement, passive movement, resisted test   |                                                            |                                            |                     |      |           |
| Hip flexion                                        | ↑                                                          | NW                                         |                     |      | √         |
| Hip abduction                                      | ↓                                                          | Better                                     | √                   |      |           |
| Hip medial rotation                                | Abolishes                                                  | Better                                     | √                   |      |           |
|                                                    |                                                            |                                            |                     |      |           |
|                                                    |                                                            |                                            |                     |      |           |
| Effect of static positioning                       |                                                            |                                            |                     |      |           |
|                                                    |                                                            |                                            |                     |      |           |
| Other tests: eg loaded, compression, unloaded etc. |                                                            |                                            |                     |      |           |
|                                                    |                                                            |                                            |                     |      |           |

SPINE

Movement Loss None

Effect of repeated movements NE

Effect of static positioning \_\_\_\_\_

Spine testing Not relevant / relevant / secondary

| PROVISIONAL CLASSIFICATION | Peripheral | Spine             |
|----------------------------|------------|-------------------|
| Dysfunction – Articular    | _____      | Contractile _____ |
| Derangement                | _____      | Postural _____    |
| Other                      | _____      | Uncertain _____   |

PRINCIPLE OF MANAGEMENT

Education \_\_\_\_\_

Exercise \_\_\_\_\_ Frequency \_\_\_\_\_

Treatment Goals \_\_\_\_\_

Date \_\_\_\_\_  
 Name 4 Sex M  
 Address \_\_\_\_\_  
 Telephone \_\_\_\_\_  
 Date of Birth \_\_\_\_\_ Age 18  
 Referral: GP / Orth / Self / Other  
 Work Professional rugby player  
 Leisure \_\_\_\_\_  
 Postures / Stresses Contact sport  
 Functional Disability from present episode Stopped playing  
 Functional Disability score \_\_\_\_\_  
 VAS Score (0-10) 9-10; 0 if rested

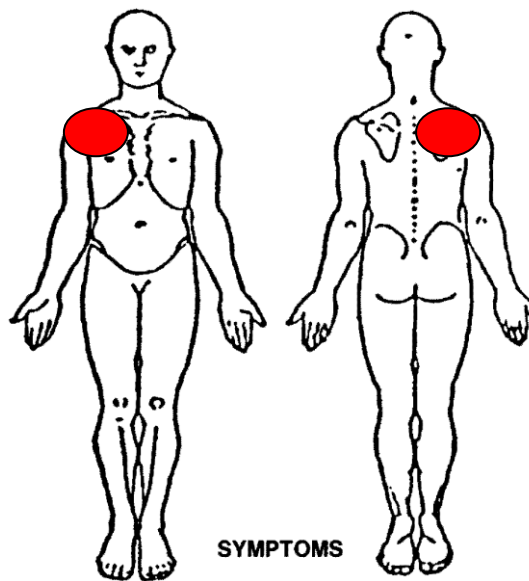

HISTORY

Present Symptoms Right shoulder pain  
 Present since 10 days *Improving / Unchanging / **Worsening***  
 Commenced as a result of Tackle - arm pulled back *or no apparent reason*  
 Symptoms at onset: Right shoulder + upper arm  
 Constant symptoms: \_\_\_\_\_ Intermittent symptoms: Right shoulder  
 What produces or worsens Rugby training - arm movements and contact  
 \_\_\_\_\_  
 What stops or reduces Rest / no training

Continued use makes the pain Better Worse No Effect

Pain at rest Yes / No

Disturbed night Yes / No

Other Questions \_\_\_\_\_

Treatments this episode Ultrasound X 3 - NE

Previous episodes None

Previous treatments \_\_\_\_\_

Spinal history None

Paraesthesia Yes / No

Medications tried None Effect \_\_\_\_\_

Present medication None

General health Good

Imaging \_\_\_\_\_

Summary: Acute / Sub-acute / Chronic Trauma / Insidious onset

Sites for physical examination Neck / shoulder

EXAMINATION

Observation Shoulder protracted

Baseline measurements (pain or functional activity) Minimal ache right shoulder

| Active Movements (note symptoms and range)                            | PDM | ERP |
|-----------------------------------------------------------------------|-----|-----|
| <u>All shoulder movements - ↑ pain ++; minimal movement available</u> | √   |     |
|                                                                       |     |     |
|                                                                       |     |     |
| Passive Movement (+/- over pressure) (note symptoms and range):       |     |     |
| <u>All shoulder movements - ↑ pain ++; limited movement available</u> |     |     |
|                                                                       |     |     |
|                                                                       |     |     |
| Resisted Test Response (pain)                                         |     |     |
| <u>All movements - ↑ pain</u>                                         |     |     |
|                                                                       |     |     |
|                                                                       |     |     |

Repeated Tests (choose the most symptomatic from above)

| Baseline symptoms                                  | Symptoms response                                                |                                               | Mechanical Response |      |           |
|----------------------------------------------------|------------------------------------------------------------------|-----------------------------------------------|---------------------|------|-----------|
|                                                    | During Movement –<br>Produce, Abolish,<br>Increase, Decrease, NE | After Movement –<br>Better, Worse, NB, NW, NE | ↑ROM                | ↓ROM | No Effect |
| Active movement, passive movement, resisted test   |                                                                  |                                               |                     |      |           |
| Flexion                                            | ↑                                                                | Worse                                         |                     | √    |           |
| Extension                                          | ↑                                                                | Worse                                         |                     |      | √         |
| Adduction                                          | ↑                                                                | Worse                                         |                     |      | √         |
| Medial + Lateral rotation                          | ↑                                                                | Worse                                         |                     |      | √         |
| Abduction                                          | ↓                                                                | Better                                        | √                   |      |           |
| Effect of static positioning                       |                                                                  |                                               |                     |      |           |
|                                                    |                                                                  |                                               |                     |      |           |
| Other tests: eg loaded, compression, unloaded etc. |                                                                  |                                               |                     |      |           |
|                                                    |                                                                  |                                               |                     |      |           |

SPINE

Movement Loss None

Effect of repeated movements NE

Effect of static positioning \_\_\_\_\_

Spine testing Not relevant / relevant / secondary problem

| PROVISIONAL CLASSIFICATION | Peripheral | Spine             |
|----------------------------|------------|-------------------|
| Dysfunction – Articular    | _____      | Contractile _____ |
| Derangement                | _____      | Postural _____    |
| Other                      | _____      | Uncertain _____   |

PRINCIPLE OF MANAGEMENT

Education \_\_\_\_\_

Exercise \_\_\_\_\_ Frequency \_\_\_\_\_

Treatment Goals \_\_\_\_\_

\_\_\_\_\_



Date \_\_\_\_\_  
 Name 5 Sex F  
 Address \_\_\_\_\_  
 Telephone \_\_\_\_\_  
 Date of Birth \_\_\_\_\_ Age 24  
 Referral: *GP / Orth / **Self** / Other* \_\_\_\_\_  
 Work Sales person  
 Leisure Touch rugby  
 Postures / Stresses Sits in car 8 hours a day  
 Functional Disability from present episode Stopped sport  
 Functional Disability score \_\_\_\_\_  
 VAS Score (0-10) 5-6 at worst

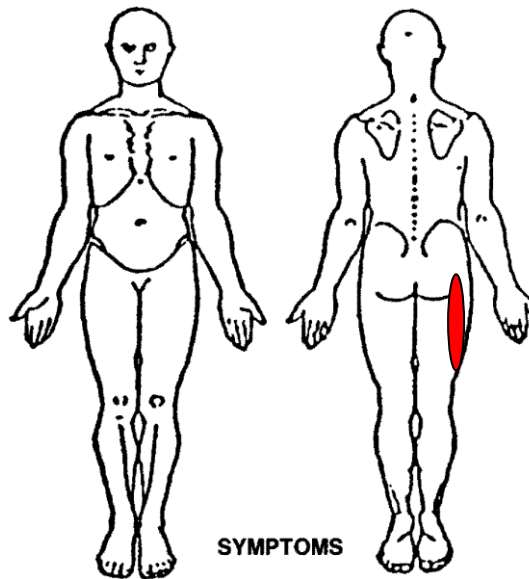

SYMPTOMS

HISTORY

Present Symptoms Right lateral thigh pain  
 Present since 8 weeks Improving / *Unchanging* / *Worsening*  
 Commenced as a result of Pain present after rugby? or *no apparent reason*  
 Symptoms at onset: Right lateral thigh  
 Constant symptoms: \_\_\_\_\_ Intermittent symptoms: Right thigh  
 What produces or worsens Running, walking  
 What stops or reduces Sitting, not weight-bearing

Continued use makes the pain Better Worse No Effect

Pain at rest Yes / No

Disturbed night Yes / No

Other Questions \_\_\_\_\_

Treatments this episode None

Previous episodes Minor problems

Previous treatments None

Spinal history None

Paraesthesia Yes / No

Medications tried None Effect \_\_\_\_\_

Present medication Asthma inhaler

General health Good apart from mild asthma

Imaging None

Summary: Acute / **Sub-acute** / Chronic Trauma / **Insidious onset?**

Sites for physical examination \_\_\_\_\_

EXAMINATION

Observation Tends to weight-bear on left leg

Baseline measurements (pain or functional activity) None

| Active Movements (note symptoms and range)                                          | PDM | ERP |
|-------------------------------------------------------------------------------------|-----|-----|
| Hip flexion - produce pain                                                          | √   |     |
| Hip medial rotation - produce pain                                                  | √   |     |
| Passive Movement (+/- over pressure) (note symptoms and range):<br><u>No effect</u> |     |     |
| Resisted Test Response (pain)<br><u>Hip flexion - produce pain + right thigh</u>    |     |     |
| <u>Other movements - NE</u>                                                         |     |     |

Repeated Tests (choose the most symptomatic from above) Mild ache right thigh

| Active movement, passive movement, resisted test   | During Movement – Produce, Abolish, Increase, Decrease, NE | After Movement – Better, Worse, NB, NW, NE | Mechanical Response |      |           |
|----------------------------------------------------|------------------------------------------------------------|--------------------------------------------|---------------------|------|-----------|
|                                                    |                                                            |                                            | ↑ROM                | ↓ROM | No Effect |
| Resisted flexion                                   | ↑                                                          | NW                                         |                     |      | √         |
| Flexion                                            | ↑                                                          | NW                                         |                     |      | √         |
| Medial rotation                                    | NE                                                         |                                            |                     |      |           |
| Adduction                                          | NE                                                         |                                            |                     |      |           |
| Extension                                          | NE                                                         |                                            |                     |      |           |
| Effect of static positioning                       |                                                            |                                            |                     |      |           |
| Other tests: eg loaded, compression, unloaded etc. |                                                            |                                            |                     |      |           |

SPINE

Movement Loss None

Effect of repeated movements NE

Effect of static positioning \_\_\_\_\_

Spine testing Not relevant / relevant / secondary

|                                       |                   |
|---------------------------------------|-------------------|
| PROVISIONAL CLASSIFICATION Peripheral | Spine             |
| Dysfunction – Articular _____         | Contractile _____ |
| Derangement _____                     | Postural _____    |
| Other _____                           | Uncertain _____   |

PRINCIPLE OF MANAGEMENT

Education \_\_\_\_\_

Exercise \_\_\_\_\_ Frequency \_\_\_\_\_

Treatment Goals \_\_\_\_\_

Date \_\_\_\_\_  
 Name 6 Sex M  
 Address \_\_\_\_\_  
 Telephone \_\_\_\_\_  
 Date of Birth \_\_\_\_\_ Age 25  
 Referral: *GP / Orth / **Self** / Other* \_\_\_\_\_  
 Work Sells cars  
 Leisure Body builder  
 Postures / Stresses Standing, walking, lifting  
 Functional Disability from present episode Limits lifting weights  
 Functional Disability score \_\_\_\_\_  
 VAS Score (0-10) 4-6

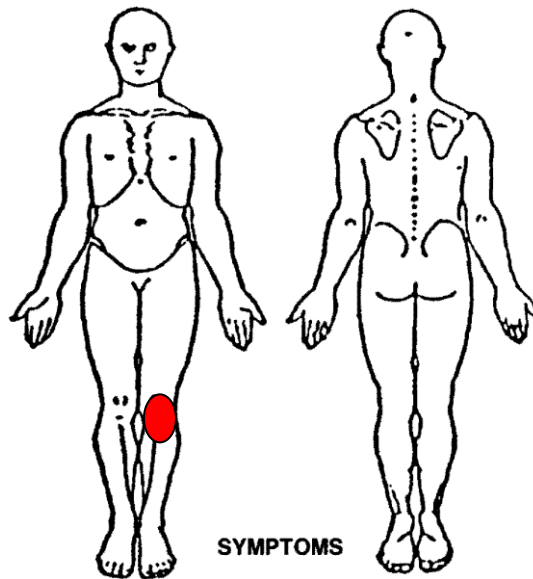

HISTORY

Present Symptoms Left anterior knee pain, knee feels weak  
 Present since 10 weeks *Improving / Unchanging / **Worsening***  
 Commenced as a result of Doing a dead lift *or no apparent reason*  
 Symptoms at onset: Knee popped' ache at left knee  
 Constant symptoms: \_\_\_\_\_ Intermittent symptoms: Left knee  
 What produces or worsens Bending, twisting, tennis  
 \_\_\_\_\_  
 What stops or reduces Limiting activity

Continued use makes the pain Better **Worse?** No Effect

Pain at rest Yes / **No**

Disturbed night Yes / **No**

Other Questions Leg feels weak, giving way sensation, ? locking

Treatments this episode None

Previous episodes None

Previous treatments None

Spinal history None

Paraesthesia Yes / **No**

Medications tried None Effect \_\_\_\_\_

Present medication None

General health Good

Imaging X-ray knee - NAD

Summary: Acute / Sub-acute / **Chronic** **Trauma** / Insidious onset

Sites for physical examination Knee

EXAMINATION

Observation Some swelling left knee?

Baseline measurements (pain or functional activity) Minimal pain in weight bearing

| Active Movements (note symptoms and range)                      | PDM | ERP |
|-----------------------------------------------------------------|-----|-----|
| Flexion                                                         | √   |     |
| Extension                                                       |     | √   |
| Passive Movement (+/- over pressure) (note symptoms and range): |     |     |
| Flexion                                                         | √   |     |
| Extension                                                       |     | √   |
| Resisted Test Response (pain)                                   |     |     |
| NE                                                              |     |     |

Repeated Tests (choose the most symptomatic from above)

| Baseline symptoms                                  | Symptoms response                                                |                                               | Mechanical Response |      |           |
|----------------------------------------------------|------------------------------------------------------------------|-----------------------------------------------|---------------------|------|-----------|
|                                                    | During Movement –<br>Produce, Abolish,<br>Increase, Decrease, NE | After Movement –<br>Better, Worse, NB, NW, NE | ↑ROM                | ↓ROM | No Effect |
| Active movement, passive movement, resisted test   |                                                                  |                                               |                     |      |           |
| Flexion                                            | ↑                                                                | NW                                            |                     |      | √         |
| Extension                                          | ↓                                                                | Better                                        | √                   |      |           |
| Effect of static positioning                       |                                                                  |                                               |                     |      |           |
| Other tests: eg loaded, compression, unloaded etc. |                                                                  |                                               |                     |      |           |

SPINE

Movement Loss \_\_\_\_\_

Effect of repeated movements \_\_\_\_\_

Effect of static positioning \_\_\_\_\_

Spine testing *Not relevant / relevant / secondary* \_\_\_\_\_

PROVISIONAL CLASSIFICATION Peripheral \_\_\_\_\_ Spine \_\_\_\_\_

Dysfunction – Articular \_\_\_\_\_ Contractile \_\_\_\_\_

Derangement \_\_\_\_\_ Postural \_\_\_\_\_

Other \_\_\_\_\_ Uncertain \_\_\_\_\_

PRINCIPLE OF MANAGEMENT

Education \_\_\_\_\_

Exercise \_\_\_\_\_ Frequency \_\_\_\_\_

Treatment Goals \_\_\_\_\_

Date \_\_\_\_\_  
 Name 7 Sex M  
 Address \_\_\_\_\_  
 Telephone \_\_\_\_\_  
 Date of Birth \_\_\_\_\_ Age 62  
 Referral: *GP / Orth / **Self** / Other* \_\_\_\_\_  
 Work Retired  
 Leisure Golf, running, rowing, cycling  
 Postures / Stresses Active  
 Functional Disability from present episode As normal with pain  
 Functional Disability score \_\_\_\_\_  
 VAS Score (0-10) 4-6

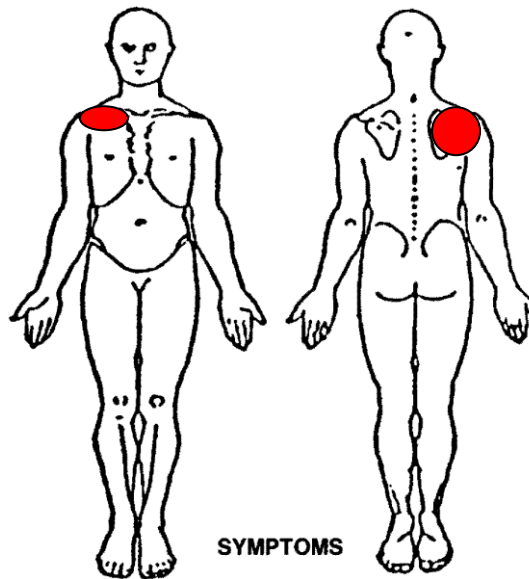

HISTORY

Present Symptoms Right neck and shoulder pain  
 Present since 10 days *Improving / **Unchanging** / Worsening*  
 Commenced as a result of \_\_\_\_\_ **no apparent reason**  
 Symptoms at onset: \_\_\_\_\_  
 Constant symptoms: \_\_\_\_\_ Intermittent symptoms: All  
 What produces or worsens Lifting, using arm  
 \_\_\_\_\_  
 What stops or reduces Not using arm

Continued use makes the pain Better **Worse** No Effect

Pain at rest Yes / **No**

Disturbed night Yes / **No**

Other Questions Some neck stiffness in morning

Treatments this episode None

Previous episodes Back / neck pain episodes

Previous treatments Exercises

Spinal history Episodic neck pain

Paraesthesia Yes / **No**

Medications tried None Effect \_\_\_\_\_

Present medication None

General health Good

Imaging Back and neck years ago

Summary: **Acute** / *Sub-acute / Chronic* *Trauma / **Insidious onset***

Sites for physical examination Neck / shoulder

EXAMINATION

Observation Poor cervical posture

Baseline measurements (pain or functional activity) None

| Active Movements (note symptoms and range)                         | PDM | ERP |
|--------------------------------------------------------------------|-----|-----|
| <u>Shoulder - full range of movement all direction and no pain</u> |     |     |
|                                                                    |     |     |
| Passive Movement (+/- over pressure) (note symptoms and range):    |     |     |
| <u>Shoulder - full range of movement all direction and no pain</u> |     |     |
|                                                                    |     |     |
| Resisted Test Response (pain)                                      |     |     |
| <u>Shoulder flexion - produced shoulder pain</u>                   |     |     |
|                                                                    |     |     |

Repeated Tests (choose the most symptomatic from above)

| Baseline symptoms                                  | Symptoms response                                          |                                            | Mechanical Response |      |           |
|----------------------------------------------------|------------------------------------------------------------|--------------------------------------------|---------------------|------|-----------|
|                                                    |                                                            |                                            | ↑ROM                | ↓ROM | No Effect |
| Active movement, passive movement, resisted test   | During Movement – Produce, Abolish, Increase, Decrease, NE | After Movement – Better, Worse, NB, NW, NE |                     |      |           |
| Resisted shoulder flexion                          | NE                                                         |                                            |                     |      |           |
| Shoulder flexion                                   | NE                                                         |                                            |                     |      |           |
| Shoulder medial rotation                           | NE                                                         |                                            |                     |      |           |
| Shoulder lateral rotation                          | NE                                                         |                                            |                     |      |           |
| Adduction                                          | NE                                                         |                                            |                     |      |           |
| Effect of static positioning                       |                                                            |                                            |                     |      |           |
| Other tests: eg loaded, compression, unloaded etc. |                                                            |                                            |                     |      |           |
|                                                    |                                                            |                                            |                     |      |           |

SPINE

Movement Loss Minor loss extension, right rotation

Effect of repeated movements Retraction / extension - ↑ range of movement; resisted flexion no pain

Effect of static positioning \_\_\_\_\_

Spine testing Not relevant / relevant / secondary problem

|                            |            |                   |
|----------------------------|------------|-------------------|
| PROVISIONAL CLASSIFICATION | Peripheral | Spine             |
| Dysfunction – Articular    | _____      | Contractile _____ |
| Derangement                | _____      | Postural _____    |
| Other                      | _____      | Uncertain _____   |

PRINCIPLE OF MANAGEMENT

Education \_\_\_\_\_

Exercise \_\_\_\_\_ Frequency \_\_\_\_\_

Treatment Goals \_\_\_\_\_

Date \_\_\_\_\_  
 Name 8 Sex M  
 Address \_\_\_\_\_  
 Telephone \_\_\_\_\_  
 Date of Birth \_\_\_\_\_ Age 25  
 Referral: GP / Orth / Self / Other \_\_\_\_\_  
 Work Oil industry  
 Leisure Squash, golf, running, cycling  
 Postures / Stresses Sitting, activity = sport  
 Functional Disability from present episode Limited sport  
 Functional Disability score \_\_\_\_\_  
 VAS Score (0-10) 6

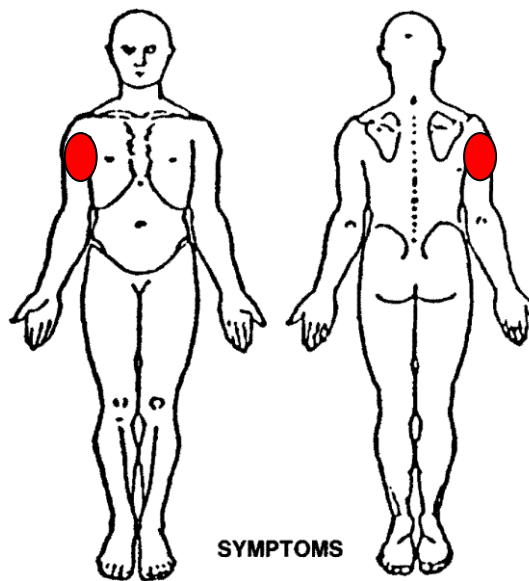

HISTORY

Present Symptoms Right shoulder  
 Present since 4 months / Unchanging / Worsening  
 Commenced as a result of Fell off bike landed on shoulder or no apparent reason  
 Symptoms at onset: Right shoulder - more painful initially  
 Constant symptoms: \_\_\_\_\_ Intermittent symptoms: Right shoulder  
 What produces or worsens Moving arm, especially out to side and overhead  
 What stops or reduces Support arm by side

Continued use makes the pain Better Worse No Effect  
 Pain at rest Yes / No (sometimes)  
 Disturbed night Yes / No  
 Other Questions Painful in all positions at night

Treatments this episode None  
 Previous episodes None  
 Previous treatments None  
 Spinal history None

Paraesthesia Yes / No

Medications tried NSAIDs Effect ? helped  
 Present medication Nil else  
 General health Good  
 Imaging X-ray - NAD  
 Summary: Acute / Sub-acute / Chronic Trauma / Insidious onset  
 Sites for physical examination Shoulder / neck

**EXAMINATION**

Observation Holds arm to side

Baseline measurements (pain or functional activity) No pain

| Active Movements (note symptoms and range)                      | PDM | ERP      |
|-----------------------------------------------------------------|-----|----------|
| <u>Flexion - 130° produced pain</u>                             |     | <u>√</u> |
| <u>Abduction 130° produced pain</u>                             |     | <u>√</u> |
| <u>Medial and lateral rotation - 1/2 ROM, produced pain</u>     |     | <u>√</u> |
| Passive Movement (+/- over pressure) (note symptoms and range): |     |          |
| <u>Flexion - 140° produced pain</u>                             |     | <u>√</u> |
| <u>Abduction 140° produced pain</u>                             |     | <u>√</u> |
| <u>Medial and lateral rotation - 1/2 ROM, produced pain</u>     |     | <u>√</u> |
| Resisted Test Response (pain) _____                             |     |          |
| <u>No effect</u>                                                |     |          |
| _____                                                           |     |          |
| _____                                                           |     |          |

Repeated Tests (choose the most symptomatic from above)

| Baseline symptoms<br>Active movement, passive movement, resisted test | Symptoms response                                                |                                               | Mechanical Response |      |           |
|-----------------------------------------------------------------------|------------------------------------------------------------------|-----------------------------------------------|---------------------|------|-----------|
|                                                                       | During Movement –<br>Produce, Abolish,<br>Increase, Decrease, NE | After Movement –<br>Better, Worse, NB, NW, NE | ↑ROM                | ↓ROM | No Effect |
| Flexion                                                               | produced                                                         | NW                                            |                     |      | √         |
| Lateral rotation                                                      | produced                                                         | NW                                            |                     |      | √         |
| Abduction                                                             | produced                                                         | NW                                            |                     |      | √         |
| Medial rotation                                                       | produced                                                         | NW                                            |                     |      | √         |
| Effect of static positioning                                          |                                                                  |                                               |                     |      |           |
| Other tests: eg loaded, compression, unloaded etc.                    |                                                                  |                                               |                     |      |           |
|                                                                       |                                                                  |                                               |                     |      |           |

**SPINE**

Movement Loss None

Effect of repeated movements NE

Effect of static positioning \_\_\_\_\_

Spine testing Not relevant / relevant / secondary problem

**PROVISIONAL CLASSIFICATION Peripheral**

|                               |           |                   |
|-------------------------------|-----------|-------------------|
| Dysfunction – Articular _____ | Spine     | Contractile _____ |
| Derangement _____             | Postural  | _____             |
| Other _____                   | Uncertain | _____             |

**PRINCIPLE OF MANAGEMENT**

Education \_\_\_\_\_

Exercise \_\_\_\_\_ Frequency \_\_\_\_\_

Treatment Goals \_\_\_\_\_



Date \_\_\_\_\_  
 Name 9 Sex M  
 Address \_\_\_\_\_  
 Telephone \_\_\_\_\_  
 Date of Birth \_\_\_\_\_ Age 60  
 Referral: GP / Orth / Self / Other  
 Work Office job  
 Leisure Gym, running  
 Postures / Stresses Sitting, sports  
 Functional Disability from present episode Continues all  
 Functional Disability score \_\_\_\_\_  
 VAS Score (0-10) \_\_\_\_\_

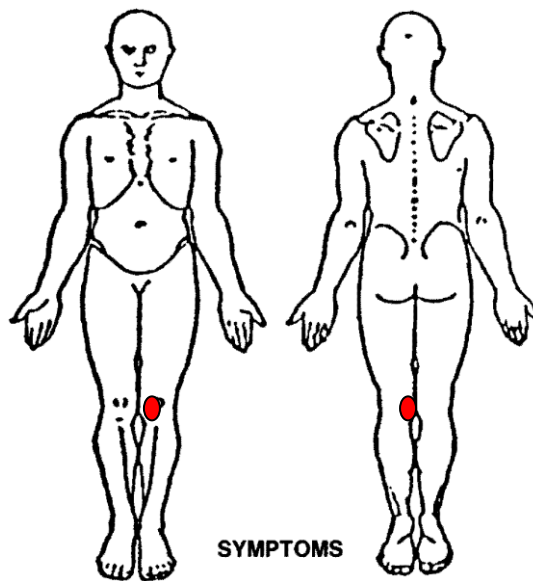

HISTORY

Present Symptoms Left medial knee pain  
 Present since 9 weeks *Improving / **Unchanging** / Worsening*  
 Commenced as a result of Running *or no apparent reason*  
 Symptoms at onset: Medial knee  
 Constant symptoms: \_\_\_\_\_ Intermittent symptoms: Left knee  
 What produces or worsens Walking, running, night  
 \_\_\_\_\_  
 What stops or reduces Not sure

Continued use makes the pain Better Worse **No Effect**  
 Pain at rest Yes / No  
 Disturbed night Yes / No  
 Other Questions \_\_\_\_\_  
 \_\_\_\_\_

Treatments this episode None  
 Previous episodes Cartilage injury 3 years ago - surgery  
 Previous treatments Physiotherapy - helped  
 Spinal history None

\_\_\_\_\_ Paraesthesia Yes / No  
 Medications tried None Effect \_\_\_\_\_

Present medication None  
 General health Good  
 Imaging X-ray - osteoarthritis

Summary: Acute / Sub-acute / **Chronic** *Trauma / **Insidious onset***  
 Sites for physical examination Knee

EXAMINATION

Observation Varus deformity knees

Baseline measurements (pain or functional activity) Minimal ache

| Active Movements (note symptoms and range)                      | PDM | ERP |
|-----------------------------------------------------------------|-----|-----|
| <u>Full ROM - no pain</u>                                       |     |     |
|                                                                 |     |     |
|                                                                 |     |     |
| Passive Movement (+/- over pressure) (note symptoms and range): |     |     |
| <u>Full ROM - pain on flexion</u>                               |     | √   |
|                                                                 |     |     |
|                                                                 |     |     |
| Resisted Test Response (pain)                                   |     |     |
| <u>Extension - produce pain</u>                                 |     |     |
|                                                                 |     |     |
|                                                                 |     |     |

Repeated Tests (choose the most symptomatic from above) Minimal pain

| Active movement, passive movement, resisted test   | During Movement – Produce, Abolish, Increase, Decrease, NE | After Movement – Better, Worse, NB, NW, NE | Mechanical Response |      |           |
|----------------------------------------------------|------------------------------------------------------------|--------------------------------------------|---------------------|------|-----------|
|                                                    |                                                            |                                            | ↑ROM                | ↓ROM | No Effect |
| Flexion                                            | NE                                                         | NE                                         |                     |      | √         |
| Extension                                          | ↑                                                          | NW                                         |                     |      | √         |
| Resisted extension                                 | ↑ +                                                        | NW                                         |                     |      | √         |
|                                                    |                                                            |                                            |                     |      |           |
|                                                    |                                                            |                                            |                     |      |           |
| Effect of static positioning                       |                                                            |                                            |                     |      |           |
|                                                    |                                                            |                                            |                     |      |           |
| Other tests: eg loaded, compression, unloaded etc. |                                                            |                                            |                     |      |           |
|                                                    |                                                            |                                            |                     |      |           |

SPINE

Movement Loss None

Effect of repeated movements NE

Effect of static positioning \_\_\_\_\_

Spine testing Not relevant / relevant / secondary problem

|                                       |                   |
|---------------------------------------|-------------------|
| PROVISIONAL CLASSIFICATION Peripheral | Spine             |
| Dysfunction – Articular _____         | Contractile _____ |
| Derangement _____                     | Postural _____    |
| Other _____                           | Uncertain _____   |

PRINCIPLE OF MANAGEMENT

Education \_\_\_\_\_

Exercise \_\_\_\_\_ Frequency \_\_\_\_\_

Treatment Goals \_\_\_\_\_

\_\_\_\_\_

Date \_\_\_\_\_  
 Name 10 Sex M  
 Address \_\_\_\_\_  
 Telephone \_\_\_\_\_  
 Date of Birth \_\_\_\_\_ Age 40  
 Referral: GP / Orth / **Self** / Other  
 Work Office job  
 Leisure Hockey  
 Postures / Stresses Sitting, active  
 Functional Disability from present episode Stopped hockey  
 Functional Disability score \_\_\_\_\_  
 VAS Score (0-10) 8-10

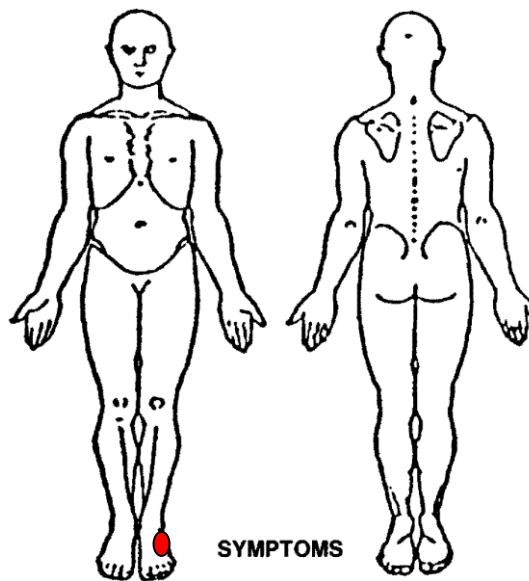

HISTORY

Present Symptoms Left ankle pain  
 Present since 1 week Improving / Unchanging / Worsening  
 Commenced as a result of Fell off bike, landed on ankle/foot or no apparent reason  
 Symptoms at onset: Ankle  
 Constant symptoms: Ankle Intermittent symptoms: \_\_\_\_\_  
 What produces or worsens Weight-bearing, movement  
 \_\_\_\_\_  
 What stops or reduces None

Continued use makes the pain Better Worse No Effect  
 Pain at rest Yes / No  
 Disturbed night Yes / No  
 Other Questions Foot feels tight

Treatments this episode Bandage at A & E  
 Previous episodes None  
 Previous treatments None  
 Spinal history None

\_\_\_\_\_ Paraesthesia Yes / No

Medications tried NSAIDs Effect None

Present medication Nil else

General health Good

Imaging X-ray - NAD

Summary: Acute / Sub-acute / Chronic Trauma / Insidious onset

Sites for physical examination \_\_\_\_\_

EXAMINATION

Observation Bruising and swelling ++ foot and ankle

Baseline measurements (pain or functional activity) \_\_\_\_\_

| Active Movements (note symptoms and range)                      | PDM | ERP |
|-----------------------------------------------------------------|-----|-----|
| Dorsiflexion                                                    | √   |     |
| Plantarflexion                                                  | √   |     |
| Inversion / eversion - very limited                             |     | √   |
| Passive Movement (+/- over pressure) (note symptoms and range): |     |     |
| Inversion - ↑ pain                                              |     | √   |
|                                                                 |     |     |
| Resisted Test Response (pain)                                   |     |     |
| Eversion - ↑ pain                                               |     |     |
|                                                                 |     |     |

Repeated Tests (choose the most symptomatic from above)

| Baseline symptoms                                  | Symptoms response                                          |                                            | Mechanical Response |      |           |
|----------------------------------------------------|------------------------------------------------------------|--------------------------------------------|---------------------|------|-----------|
|                                                    | During Movement – Produce, Abolish, Increase, Decrease, NE | After Movement – Better, Worse, NB, NW, NE | ↑ROM                | ↓ROM | No Effect |
| Active movement, passive movement, resisted test   |                                                            |                                            |                     |      |           |
| Plantarflexion                                     | ↑                                                          | NW                                         |                     |      | √         |
| Dorsiflexion                                       | ↑                                                          | NW                                         |                     |      | √         |
| Inversion                                          | ↑                                                          | Worse                                      |                     | √    |           |
| Resisted eversion                                  | ↑                                                          | Worse                                      |                     |      |           |
|                                                    |                                                            |                                            |                     |      |           |
| Effect of static positioning                       |                                                            |                                            |                     |      |           |
|                                                    |                                                            |                                            |                     |      |           |
| Other tests: eg loaded, compression, unloaded etc. |                                                            |                                            |                     |      |           |
|                                                    |                                                            |                                            |                     |      |           |

SPINE

Movement Loss None

Effect of repeated movements NE

Effect of static positioning \_\_\_\_\_

Spine testing Not relevant / relevant / secondary problem

|                                       |                   |
|---------------------------------------|-------------------|
| PROVISIONAL CLASSIFICATION Peripheral | Spine             |
| Dysfunction – Articular _____         | Contractile _____ |
| Derangement _____                     | Postural _____    |
| Other _____                           | Uncertain _____   |

PRINCIPLE OF MANAGEMENT

Education \_\_\_\_\_

Exercise \_\_\_\_\_ Frequency \_\_\_\_\_

Treatment Goals \_\_\_\_\_

Date \_\_\_\_\_  
 Name 11 Sex M  
 Address \_\_\_\_\_  
 Telephone \_\_\_\_\_  
 Date of Birth \_\_\_\_\_ Age 26  
 Referral: GP / Orth / Self / Other  
 Work Joiner  
 Leisure Football, golf  
 Postures / Stresses Active  
 Functional Disability from present episode Stopped football  
 Functional Disability score \_\_\_\_\_  
 VAS Score (0-10) 5

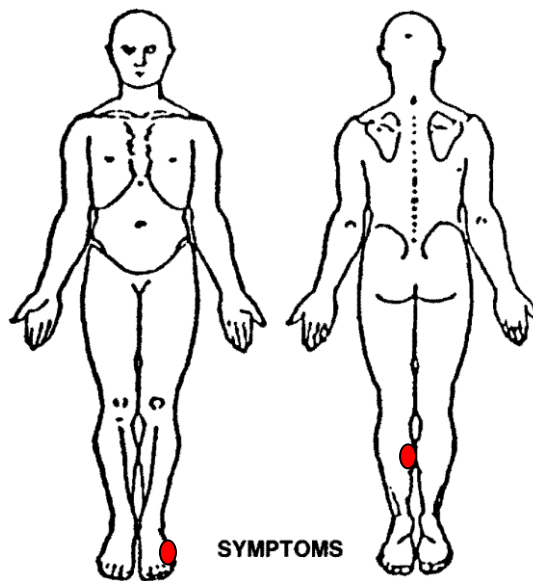

HISTORY

Present Symptoms Left calf pain and pins and needles in toes  
 Present since 7 weeks *Improving / **Unchanging** / Worsening*  
 Commenced as a result of Football *or no apparent reason*  
 Symptoms at onset: Calf  
 Constant symptoms: Tingling toes Intermittent symptoms: Calf  
 What produces or worsens Walking, stairs, stretching calf  
 What stops or reduces Better at rest

Continued use makes the pain Better **Worse** No Effect  
 Pain at rest Yes / **No**  
 Disturbed night Yes / **No**  
 Other Questions Pins and needles has had before

Treatments this episode None  
 Previous episodes None  
 Previous treatments \_\_\_\_\_  
 Spinal history Slipped disc 3 years ago

\_\_\_\_\_ Paraesthesia Yes / No

Medications tried None Effect \_\_\_\_\_  
 Present medication None  
 General health Good  
 Imaging None

Summary: Acute / **Sub-acute** / Chronic **Trauma** / Insidious onset  
 Sites for physical examination Leg / back?

EXAMINATION

Observation NAD

Baseline measurements (pain or functional activity) No pain

| Active Movements (note symptoms and range)                      | PDM | ERP |
|-----------------------------------------------------------------|-----|-----|
| <u>Dorsiflexion - minor loss ROM - produce pain</u>             |     | √   |
| <u>Plantarflexion - produce pain</u>                            | √   |     |
| Passive Movement (+/- over pressure) (note symptoms and range): |     |     |
| <u>Dorsiflexion - full ROM - produce pain</u>                   |     | √   |
| <u>Plantarflexion - NE</u>                                      |     |     |
| Resisted Test Response (pain)                                   |     |     |
| <u>Plantarflexion - produce pain ++</u>                         |     |     |

Repeated Tests (choose the most symptomatic from above) None

| Baseline symptoms                                  | Symptoms response                                                | After Movement –<br>Better, Worse, NB, NW, NE | Mechanical Response |      |           |
|----------------------------------------------------|------------------------------------------------------------------|-----------------------------------------------|---------------------|------|-----------|
|                                                    |                                                                  |                                               | ↑ROM                | ↓ROM | No Effect |
| Active movement, passive movement, resisted test   | During Movement –<br>Produce, Abolish,<br>Increase, Decrease, NE |                                               |                     |      |           |
| Dorsiflexion                                       | produces                                                         | NW                                            |                     |      | √         |
| Plantarflexion                                     | produces                                                         | NW                                            |                     |      | √         |
| Resisted plantarflexion                            | produces                                                         | NW                                            |                     |      | √         |
| Effect of static positioning                       |                                                                  |                                               |                     |      |           |
| Other tests: eg loaded, compression, unloaded etc. |                                                                  |                                               |                     |      |           |

SPINE

Movement Loss None

Effect of repeated movements NE

Effect of static positioning NE

Spine testing Not relevant / relevant / secondary problem

| PROVISIONAL CLASSIFICATION | Peripheral | Spine       |
|----------------------------|------------|-------------|
| Dysfunction – Articular    |            | Contractile |
| Derangement                |            | Postural    |
| Other                      |            | Uncertain   |

PRINCIPLE OF MANAGEMENT

Education \_\_\_\_\_

Exercise \_\_\_\_\_ Frequency \_\_\_\_\_

Treatment Goals \_\_\_\_\_

Date \_\_\_\_\_  
 Name 12 Sex M  
 Address \_\_\_\_\_  
 Telephone \_\_\_\_\_  
 Date of Birth \_\_\_\_\_ Age 38  
 Referral: GP / Orth / Self / Other \_\_\_\_\_  
 Work Driver  
 Leisure 5-aside football  
 Postures / Stresses Sitting / driving  
 Functional Disability from present episode Stopped football  
 Functional Disability score \_\_\_\_\_  
 VAS Score (0-10) 4

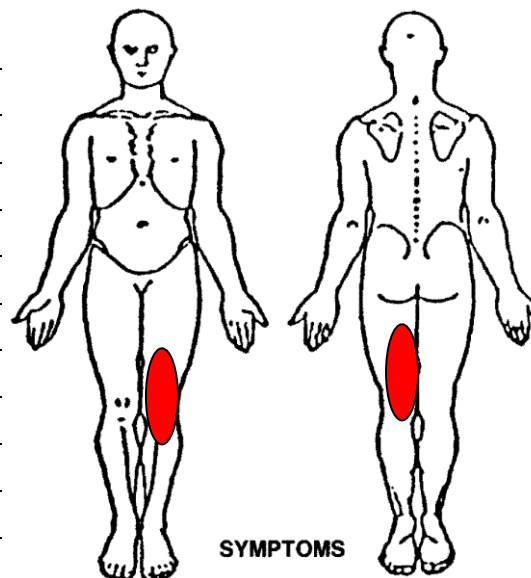

HISTORY

Present Symptoms Left thigh and knee  
 Present since 2 months *Improving / Unchanging / **Worsening***  
 Commenced as a result of Football, twisted leg *or no apparent reason*  
 Symptoms at onset: Thigh  
 Constant symptoms: \_\_\_\_\_ Intermittent symptoms: All  
 What produces or worsens Prolonged sitting, stairs, movement  
 \_\_\_\_\_  
 What stops or reduces Rest, heat

Continued use makes the pain Better Worse No Effect

Pain at rest Yes / No

Disturbed night Yes / No

Other Questions 4 years ago left ACL repair; 15 years ago fracture of left femur

Treatments this episode None

Previous episodes None

Previous treatments None - rehab post-cruciate repair

Spinal history None

Paraesthesia Yes / No

Medications tried None Effect \_\_\_\_\_

Present medication None

General health Good

Imaging None

Summary: Acute / Sub-acute / **Chronic** **Trauma** / Insidious onset

Sites for physical examination Knee / thigh

EXAMINATION

Observation Some swelling left knee; not fully weight-bearing

Baseline measurements (pain or functional activity) No pain

| Active Movements (note symptoms and range)                      | PDM | ERP |
|-----------------------------------------------------------------|-----|-----|
| <u>Knee flexion - some loss of ROM, pain</u>                    | √   |     |
| <u>Knee extension - some loss of ROM, pain</u>                  | √   |     |
| Passive Movement (+/- over pressure) (note symptoms and range): |     |     |
| <u>Knee flexion - some loss of ROM, pain</u>                    | √   |     |
| <u>Knee extension - some loss of ROM, pain</u>                  |     | √   |
| Resisted Test Response (pain)                                   |     |     |
| <u>NE</u>                                                       |     |     |

Repeated Tests (choose the most symptomatic from above) No pain

| Baseline symptoms                                  | Symptoms response                                                | After Movement –<br>Better, Worse, NB, NW, NE | Mechanical Response |      |           |
|----------------------------------------------------|------------------------------------------------------------------|-----------------------------------------------|---------------------|------|-----------|
|                                                    |                                                                  |                                               | ↑ROM                | ↓ROM | No Effect |
| Active movement, passive movement, resisted test   | During Movement –<br>Produce, Abolish,<br>Increase, Decrease, NE |                                               |                     |      |           |
| Flexion                                            | Produced knee pain                                               | NW                                            |                     |      | √         |
| Extension                                          | Produced thigh pain                                              | NW                                            |                     |      | √         |
| Medial rotation                                    |                                                                  |                                               | √                   |      |           |
| Effect of static positioning                       |                                                                  |                                               |                     |      |           |
| Other tests: eg loaded, compression, unloaded etc. |                                                                  |                                               |                     |      |           |

SPINE

Movement Loss \_\_\_\_\_

Effect of repeated movements Tested

Effect of static positioning \_\_\_\_\_

Spine testing *Not relevant / relevant / secondary* \_\_\_\_\_

PROVISIONAL CLASSIFICATION Peripheral \_\_\_\_\_ Spine \_\_\_\_\_

Dysfunction – Articular \_\_\_\_\_ Contractile \_\_\_\_\_

Derangement \_\_\_\_\_ Postural \_\_\_\_\_

Other \_\_\_\_\_ Uncertain \_\_\_\_\_

PRINCIPLE OF MANAGEMENT

Education \_\_\_\_\_

Exercise \_\_\_\_\_ Frequency \_\_\_\_\_

Treatment Goals \_\_\_\_\_



Date \_\_\_\_\_  
 Name 13 Sex M  
 Address \_\_\_\_\_  
 Telephone \_\_\_\_\_  
 Date of Birth \_\_\_\_\_ Age 18  
 Referral: GP / Orth / Self / Other \_\_\_\_\_  
 Work School  
 Leisure Rugby  
 Postures / Stresses Sitting, plus active, rugby X 4 a week  
 Functional Disability from present episode Stopped rugby  
 Functional Disability score \_\_\_\_\_  
 VAS Score (0-10) 6

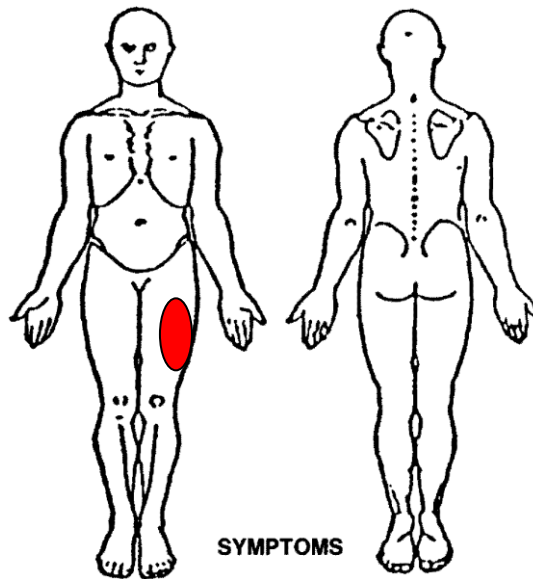

HISTORY

Present Symptoms Left anterior thigh  
 Present since 5 days *Improving / **Unchanging** / Worsening*  
 Commenced as a result of Hit in thigh during rugby *or no apparent reason*  
 Symptoms at onset: Thigh  
 Constant symptoms: Thigh Intermittent symptoms: \_\_\_\_\_  
 What produces or worsens Walking, in morning stiff and painful  
 What stops or reduces Rest, positioning mid knee/hip flexion

Continued use makes the pain Better Worse No Effect

Pain at rest Yes / No

Disturbed night Yes / No

Other Questions \_\_\_\_\_

Treatments this episode Using ice

Previous episodes None

Previous treatments \_\_\_\_\_

Spinal history None

Paraesthesia Yes / No

Medications tried None Effect \_\_\_\_\_

Present medication None

General health Good

Imaging None

Summary: Acute / Sub-acute / Chronic Trauma / Insidious onset

Sites for physical examination Hip / knee / thigh

EXAMINATION

Observation Swelling anterior thigh

Baseline measurements (pain or functional activity) No pain

| Active Movements (note symptoms and range)                      | PDM | ERP |
|-----------------------------------------------------------------|-----|-----|
| Knee extension                                                  | √   |     |
| Knee flexion                                                    |     | √   |
| Passive Movement (+/- over pressure) (note symptoms and range): |     |     |
| Knee extension - no pain                                        |     |     |
| Knee flexion                                                    |     | √   |
| Resisted Test Response (pain)                                   |     |     |
| Knee extension - pain                                           |     |     |
|                                                                 |     |     |

Repeated Tests (choose the most symptomatic from above)

| Baseline symptoms                                  | Symptoms response                                          |                                            | Mechanical Response |      |           |
|----------------------------------------------------|------------------------------------------------------------|--------------------------------------------|---------------------|------|-----------|
|                                                    | During Movement – Produce, Abolish, Increase, Decrease, NE | After Movement – Better, Worse, NB, NW, NE | ↑ROM                | ↓ROM | No Effect |
| Active movement, passive movement, resisted test   |                                                            |                                            |                     |      |           |
| Flexion                                            | ↑                                                          | NW                                         |                     |      | √         |
| Extension                                          | ↑                                                          | NW                                         |                     |      | √         |
| Resisted knee extension                            | ↑                                                          | W                                          |                     |      | √         |
|                                                    |                                                            |                                            |                     |      |           |
|                                                    |                                                            |                                            |                     |      |           |
| Effect of static positioning                       |                                                            |                                            |                     |      |           |
|                                                    |                                                            |                                            |                     |      |           |
| Other tests: eg loaded, compression, unloaded etc. |                                                            |                                            |                     |      |           |
|                                                    |                                                            |                                            |                     |      |           |

SPINE

Movement Loss \_\_\_\_\_

Effect of repeated movements \_\_\_\_\_

Effect of static positioning \_\_\_\_\_

Spine testing *Not relevant / relevant / secondary* \_\_\_\_\_

|                                             |                   |
|---------------------------------------------|-------------------|
| PROVISIONAL CLASSIFICATION Peripheral _____ | Spine _____       |
| Dysfunction – Articular _____               | Contractile _____ |
| Derangement _____                           | Postural _____    |
| Other _____                                 | Uncertain _____   |

PRINCIPLE OF MANAGEMENT

Education \_\_\_\_\_

Exercise \_\_\_\_\_ Frequency \_\_\_\_\_

Treatment Goals \_\_\_\_\_

Date \_\_\_\_\_  
 Name 14 Sex M  
 Address \_\_\_\_\_  
 Telephone \_\_\_\_\_  
 Date of Birth \_\_\_\_\_ Age 57  
 Referral: GP / Orth / Self / Other  
 Work Crane operator  
 Leisure Swimming  
 Postures / Stresses Sitting, lifting  
 Functional Disability from present episode Off work  
 Functional Disability score \_\_\_\_\_  
 VAS Score (0-10) 6

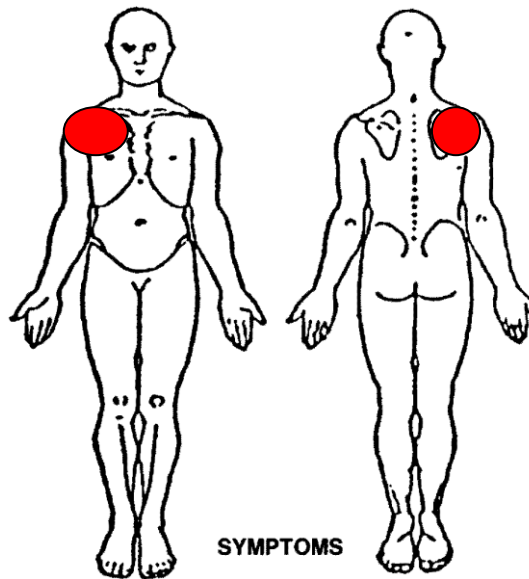

HISTORY

Present Symptoms Right shoulder  
 Present since 5 weeks Improving / Unchanging / Worsening  
 Commenced as a result of Pulled arm when working crane or no apparent reason  
 Symptoms at onset: Right shoulder  
 Constant symptoms: \_\_\_\_\_ Intermittent symptoms: Right shoulder  
 What produces or worsens Swimming, using arm  
 What stops or reduces Heat, rest

Continued use makes the pain Better Worse No Effect

Pain at rest Yes / No

Disturbed night Yes / No

Other Questions \_\_\_\_\_

Treatments this episode Heat rub

Previous episodes \_\_\_\_\_

Previous treatments \_\_\_\_\_

Spinal history Discectomy lumbar spine 15 years ago

Paraesthesia Yes / No

Medications tried None Effect \_\_\_\_\_

Present medication None

General health Good

Imaging None

Summary: Acute / Sub-acute / Chronic Trauma / Insidious onset

Sites for physical examination Neck, shoulder

EXAMINATION

Observation Poor posture

Baseline measurements (pain or functional activity) No pain

| Active Movements (note symptoms and range)                      | PDM | ERP |
|-----------------------------------------------------------------|-----|-----|
| <u>Flexion produced pain</u>                                    |     | √   |
| <u>Medial Rotation - reduced ROM, produced pain ++</u>          | √   |     |
| Passive Movement (+/- over pressure) (note symptoms and range): |     |     |
| <u>Flexion produced pain</u>                                    |     |     |
| <u>Medial Rotation - reduced ROM, produced pain ++</u>          |     | √   |
| Resisted Test Response (pain)                                   |     |     |
| <u>All movements produced pain</u>                              |     |     |

Repeated Tests (choose the most symptomatic from above)

| Baseline symptoms                                  | Symptoms response                                                |                                               | Mechanical Response |      |           |
|----------------------------------------------------|------------------------------------------------------------------|-----------------------------------------------|---------------------|------|-----------|
|                                                    | During Movement –<br>Produce, Abolish,<br>Increase, Decrease, NE | After Movement –<br>Better, Worse, NB, NW, NE | ↑ROM                | ↓ROM | No Effect |
| Active movement, passive movement, resisted test   |                                                                  |                                               |                     |      |           |
| Flexion                                            | produced                                                         | NW                                            |                     |      | √         |
| Medial rotation                                    | produced                                                         | NW                                            | √                   |      |           |
|                                                    |                                                                  |                                               |                     |      |           |
|                                                    |                                                                  |                                               |                     |      |           |
| Effect of static positioning                       |                                                                  |                                               |                     |      |           |
|                                                    |                                                                  |                                               |                     |      |           |
| Other tests: eg loaded, compression, unloaded etc. |                                                                  |                                               |                     |      |           |
|                                                    |                                                                  |                                               |                     |      |           |

SPINE

Movement Loss No loss

Effect of repeated movements No effect

Effect of static positioning \_\_\_\_\_

Spine testing Not relevant / relevant / secondary

| PROVISIONAL CLASSIFICATION | Peripheral | Spine             |
|----------------------------|------------|-------------------|
| Dysfunction – Articular    | _____      | Contractile _____ |
| Derangement                | _____      | Postural _____    |
| Other                      | _____      | Uncertain _____   |

PRINCIPLE OF MANAGEMENT

Education \_\_\_\_\_

Exercise \_\_\_\_\_ Frequency \_\_\_\_\_

Treatment Goals \_\_\_\_\_

Date \_\_\_\_\_  
 Name 15 Sex M  
 Address \_\_\_\_\_  
 Telephone \_\_\_\_\_  
 Date of Birth \_\_\_\_\_ Age 26  
 Referral: GP / Orth / Self / Other  
 Work Office job  
 Leisure Football  
 Postures / Stresses Sitting  
 Functional Disability from present episode Stopped playing football  
 Functional Disability score \_\_\_\_\_  
 VAS Score (0-10) 4-6

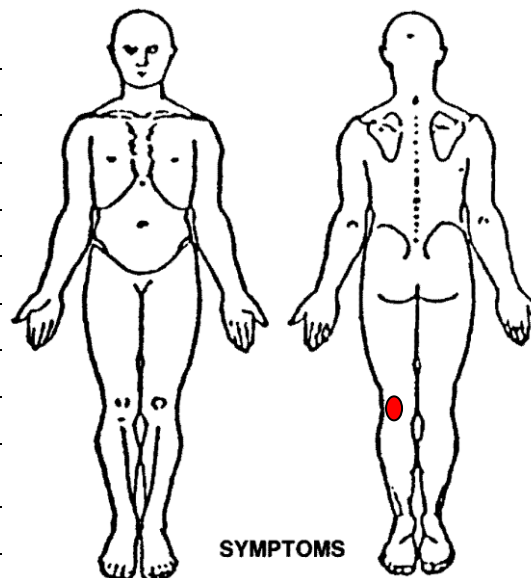

HISTORY

Present Symptoms Left lateral knee pain  
 Present since 14 days *Improving / **Unchanging** / Worsening*  
 Commenced as a result of Twisted leg when playing football *or no apparent reason*  
 Symptoms at onset: Left lateral knee pain  
 Constant symptoms: Left lateral knee pain Intermittent symptoms: \_\_\_\_\_  
 What produces or worsens Weight bearing, moving knee

What stops or reduces Rest knee semi-flexed position

Continued use makes the pain Better Worse No Effect

Pain at rest Yes / No

Disturbed night Yes / No

Other Questions \_\_\_\_\_

Treatments this episode None

Previous episodes None

Previous treatments None

Spinal history None

Paraesthesia Yes / No

Medications tried NSAIDs Effect Not helping

Present medication Nil else

General health Good

Imaging None

Summary: Acute / **Sub-acute** / Chronic Trauma / Insidious onset

Sites for physical examination \_\_\_\_\_

EXAMINATION

Observation Some knee swelling, holds knee slightly flexed

Baseline measurements (pain or functional activity) \_\_\_\_\_

| Active Movements (note symptoms and range)                      | PDM | ERP |
|-----------------------------------------------------------------|-----|-----|
| Flexion - full range, pain                                      | √   |     |
| Extension - minor loss ROM, pain                                |     | √   |
| Passive Movement (+/- over pressure) (note symptoms and range): |     |     |
| Flexion - full range, pain                                      | √   |     |
| Extension - minor loss ROM, pain                                |     | √   |
| Resisted Test Response (pain)                                   |     |     |
| No effect                                                       |     |     |

Repeated Tests (choose the most symptomatic from above)

| Baseline symptoms                                  | Symptoms response                                          |                                            | Mechanical Response |      |           |
|----------------------------------------------------|------------------------------------------------------------|--------------------------------------------|---------------------|------|-----------|
|                                                    | During Movement – Produce, Abolish, Increase, Decrease, NE | After Movement – Better, Worse, NB, NW, NE | ↑ROM                | ↓ROM | No Effect |
| Active movement, passive movement, resisted test   |                                                            |                                            |                     |      |           |
| Flexion                                            | ↑                                                          | NW                                         |                     |      | √         |
| Extension                                          | ↓                                                          | Better                                     | √                   |      |           |
| Effect of static positioning                       |                                                            |                                            |                     |      |           |
| Other tests: eg loaded, compression, unloaded etc. |                                                            |                                            |                     |      |           |

SPINE

Movement Loss None

Effect of repeated movements No effect

Effect of static positioning \_\_\_\_\_

Spine testing Not relevant / relevant / secondary

| PROVISIONAL CLASSIFICATION | Peripheral | Spine             |
|----------------------------|------------|-------------------|
| Dysfunction – Articular    | _____      | Contractile _____ |
| Derangement                | _____      | Postural _____    |
| Other                      | _____      | Uncertain _____   |

PRINCIPLE OF MANAGEMENT

Education \_\_\_\_\_

Exercise \_\_\_\_\_ Frequency \_\_\_\_\_

Treatment Goals \_\_\_\_\_

Date \_\_\_\_\_  
 Name 16 Sex M  
 Address \_\_\_\_\_  
 Telephone \_\_\_\_\_  
 Date of Birth \_\_\_\_\_ Age 32  
 Referral: GP / Orth / Self / Other  
 Work Computer operator  
 Leisure Active sports  
 Postures / Stresses Sitting plus activity  
 Functional Disability from present episode Stopped sporting activity  
 Functional Disability score \_\_\_\_\_  
 VAS Score (0-10) 4-6

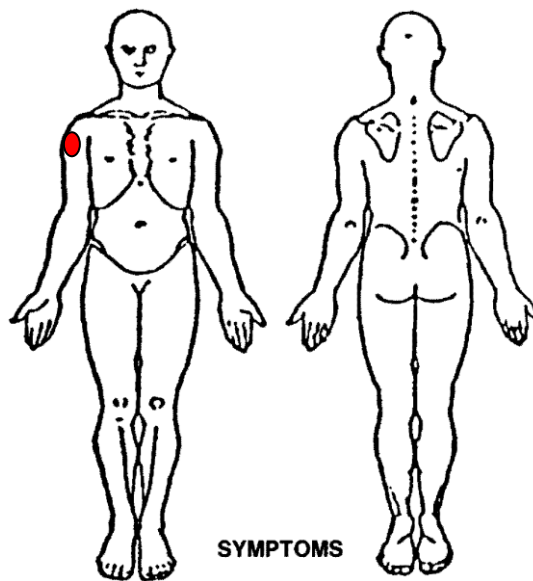

HISTORY

Present Symptoms Right shoulder / arm  
 Present since 2 months *Improving / **Unchanging** / Worsening*  
 Commenced as a result of Lots of decorating with arm overhead *or no apparent reason*  
 Symptoms at onset: Right shoulder / arm pain  
 Constant symptoms: \_\_\_\_\_ Intermittent symptoms: Right shoulder / arm pain  
 What produces or worsens Backhand movement at squash, driving car, leaning on arm  
 \_\_\_\_\_  
 What stops or reduces Resting arm by side

Continued use makes the pain Better Worse No Effect

Pain at rest Yes / No

Disturbed night Yes / No

Other Questions Neck stiff but no pain

Treatments this episode None

Previous episodes None

Previous treatments None

Spinal history None

Paraesthesia Yes / No

Medications tried None

Effect \_\_\_\_\_

Present medication None

General health Good

Imaging None

Summary: Acute / Sub-acute / **Chronic**

**Trauma ?/ Insidious onset**

Sites for physical examination Shoulder, neck

**EXAMINATION**

Observation Poor posture

Baseline measurements (pain or functional activity) No pain

| Active Movements (note symptoms and range)                      | PDM | ERP |
|-----------------------------------------------------------------|-----|-----|
| <u>Medial rotation - loss ROM, produces pain ++</u>             | √   |     |
| <u>Abduction - produces pain ++</u>                             | √   |     |
| Passive Movement (+/- over pressure) (note symptoms and range): |     |     |
| <u>Medial rotation - loss ROM, produces pain</u>                | √   |     |
| <u>Abduction - produces pain</u>                                | √   |     |
| Resisted Test Response (pain)                                   |     |     |
| <u>No effect</u>                                                |     |     |

Repeated Tests (choose the most symptomatic from above)

| Baseline symptoms                                  | Symptoms response                                                |                                               | Mechanical Response |      |           |
|----------------------------------------------------|------------------------------------------------------------------|-----------------------------------------------|---------------------|------|-----------|
|                                                    | During Movement –<br>Produce, Abolish,<br>Increase, Decrease, NE | After Movement –<br>Better, Worse, NB, NW, NE | ↑ROM                | ↓ROM | No Effect |
| Active movement, passive movement, resisted test   |                                                                  |                                               |                     |      |           |
| Abduction                                          | Produced                                                         | Worse                                         |                     | √    |           |
| Medial rotation                                    | Decrease                                                         | Better                                        | √                   |      |           |
| Effect of static positioning                       |                                                                  |                                               |                     |      |           |
| Other tests: eg loaded, compression, unloaded etc. |                                                                  |                                               |                     |      |           |

**SPINE**

Movement Loss None

Effect of repeated movements No effect

Effect of static positioning \_\_\_\_\_

Spine testing Not relevant / relevant / secondary

|                                             |                   |
|---------------------------------------------|-------------------|
| PROVISIONAL CLASSIFICATION Peripheral _____ | Spine _____       |
| Dysfunction – Articular _____               | Contractile _____ |
| Derangement _____                           | Postural _____    |
| Other _____                                 | Uncertain _____   |

**PRINCIPLE OF MANAGEMENT**

Education \_\_\_\_\_

Exercise \_\_\_\_\_ Frequency \_\_\_\_\_

Treatment Goals \_\_\_\_\_



Date \_\_\_\_\_  
 Name 17 Sex F  
 Address \_\_\_\_\_  
 Telephone \_\_\_\_\_  
 Date of Birth \_\_\_\_\_ Age 17  
 Referral: GP / Orth / Self / Other \_\_\_\_\_  
 Work School student  
 Leisure Tennis  
 Postures / Stresses Sitting  
 Functional Disability from present episode Stopped tennis  
 Functional Disability score \_\_\_\_\_  
 VAS Score (0-10) 8

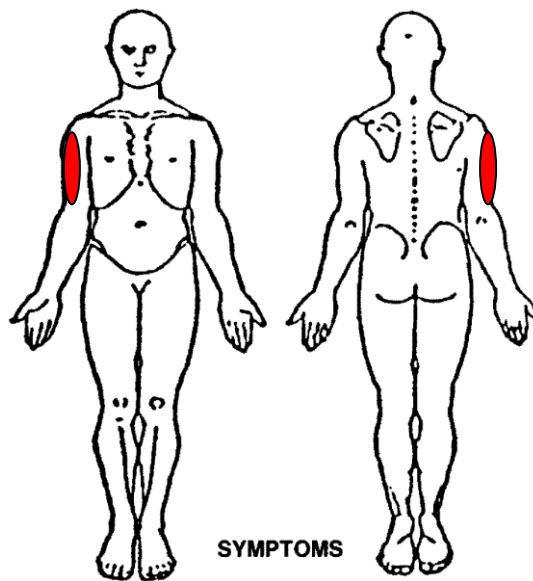

HISTORY

Present Symptoms Right arm pain  
 Present since 2 months *Improving / Unchanging / Worsening*  
 Commenced as a result of Fell and landed on outstretched arm *or no apparent reason*  
 Symptoms at onset: \_\_\_\_\_  
 Constant symptoms: \_\_\_\_\_ Intermittent symptoms: Right arm pain  
 What produces or worsens Leaning on arm, arm activity  
 \_\_\_\_\_  
 What stops or reduces Rest

Continued use makes the pain Better Worse No Effect

Pain at rest Yes / No

Disturbed night Yes / No

Other Questions \_\_\_\_\_  
 \_\_\_\_\_

Treatments this episode None

Previous episodes None

Previous treatments None

Spinal history None

Paraesthesia Yes / No

Medications tried NSAIDs Effect Helped now NE

Present medication Nil else

General health Good

Imaging X-ray shoulder and clavicle - NAD

Summary: Acute / Sub-acute / **Chronic** **Trauma** / Insidious onset

Sites for physical examination \_\_\_\_\_  
 \_\_\_\_\_

EXAMINATION

Observation \_\_\_\_\_

Baseline measurements (pain or functional activity) No pain

| Active Movements (note symptoms and range)                      | PDM | ERP |
|-----------------------------------------------------------------|-----|-----|
| Flexion - produced pain                                         |     | √   |
| Abduction - produced pain                                       |     | √   |
| Lateral Rotation - decreased ROM, produced pain                 | √   |     |
| Passive Movement (+/- over pressure) (note symptoms and range): |     |     |
| Flexion - produced pain                                         | √   |     |
| Abduction - produced pain                                       | √   |     |
| Lateral Rotation - full ROM, produced pain                      | √   |     |
| Resisted Test Response (pain)                                   |     |     |
| Abduction produced pain ++                                      |     |     |
| Lateral rotation produced pain                                  |     |     |

Repeated Tests (choose the most symptomatic from above)

| Baseline symptoms                                  | Symptoms response                                          |                                            | Mechanical Response |      |           |
|----------------------------------------------------|------------------------------------------------------------|--------------------------------------------|---------------------|------|-----------|
|                                                    | During Movement – Produce, Abolish, Increase, Decrease, NE | After Movement – Better, Worse, NB, NW, NE | ↑ROM                | ↓ROM | No Effect |
| Active movement, passive movement, resisted test   |                                                            |                                            |                     |      |           |
| Flexion                                            | produced                                                   | NW                                         |                     |      | √         |
| Abduction                                          | produced                                                   | NW                                         |                     |      | √         |
| Lateral rotation                                   | produced                                                   | NW                                         |                     |      | √         |
| Resisted abduction                                 | produced ++                                                | NW                                         |                     |      | √         |
| Effect of static positioning                       |                                                            |                                            |                     |      |           |
| Other tests: eg loaded, compression, unloaded etc. |                                                            |                                            |                     |      |           |

SPINE

Movement Loss None

Effect of repeated movements No effect

Effect of static positioning \_\_\_\_\_

Spine testing *Not relevant / relevant / secondary* \_\_\_\_\_

PROVISIONAL CLASSIFICATION Peripheral \_\_\_\_\_ Spine \_\_\_\_\_

Dysfunction – Articular \_\_\_\_\_ Contractile \_\_\_\_\_

Derangement \_\_\_\_\_ Postural \_\_\_\_\_

Other \_\_\_\_\_ Uncertain \_\_\_\_\_

PRINCIPLE OF MANAGEMENT

Education \_\_\_\_\_

Exercise \_\_\_\_\_ Frequency \_\_\_\_\_

Treatment Goals \_\_\_\_\_

Date \_\_\_\_\_  
 Name 18 Sex M  
 Address \_\_\_\_\_  
 Telephone \_\_\_\_\_  
 Date of Birth \_\_\_\_\_ Age 30  
 Referral: GP / Orth / Self / Other  
 Work Office work  
 Leisure Running  
 Postures / Stresses Sitting, running  
 Functional Disability from present episode Very limited running  
 Functional Disability score \_\_\_\_\_  
 VAS Score (0-10) 4

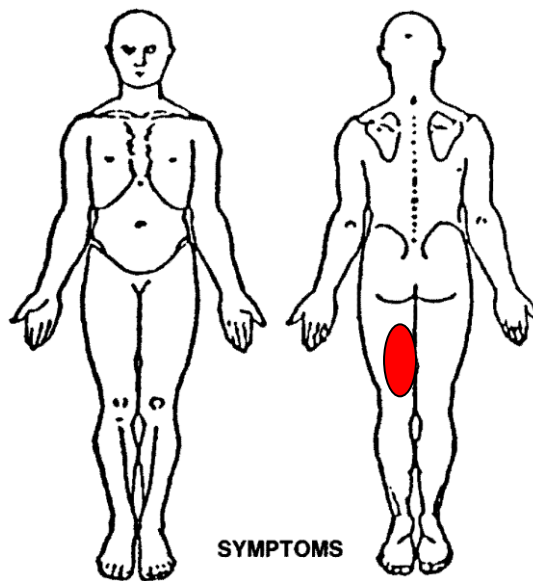

HISTORY

Present Symptoms Left posterior thigh  
 Present since 7 weeks *Improving / **Unchanging** / Worsening*  
 Commenced as a result of Whilst sprinting - felt discomfort *or no apparent reason*  
 Symptoms at onset: Left posterior thigh  
 Constant symptoms: \_\_\_\_\_ Intermittent symptoms: Left posterior thigh  
 What produces or worsens Running, walking (especially if past), sitting on hard seat  
 What stops or reduces Rest

Continued use makes the pain Better Worse No Effect

Pain at rest Yes / No

Disturbed night Yes / No

Other Questions \_\_\_\_\_

Treatments this episode None

Previous episodes None

Previous treatments None

Spinal history None

Paraesthesia Yes / No

Medications tried None Effect \_\_\_\_\_

Present medication None

General health Diabetic - diet controlled

Imaging None

Summary: Acute / **Sub-acute** / Chronic **Trauma** / Insidious onset

Sites for physical examination Knee, hip, lumbar spine

EXAMINATION

Observation NAD

Baseline measurements (pain or functional activity) None

| Active Movements (note symptoms and range)                      | PDM      | ERP      |
|-----------------------------------------------------------------|----------|----------|
| <u>Knee flexion - produced pain</u>                             | <u>√</u> |          |
| <u>Hip extension - produced pain</u>                            | <u>√</u> |          |
| <u>Hip flexion with knee extension - produced pain</u>          |          | <u>√</u> |
| Passive Movement (+/- over pressure) (note symptoms and range): |          |          |
| <u>Hip flexion with knee extension - produced pain</u>          |          | <u>√</u> |
|                                                                 |          |          |
| Resisted Test Response (pain)                                   |          |          |
| <u>Knee flexion - produced pain +</u>                           |          |          |
| <u>Hip extension - produced pain</u>                            |          |          |

Repeated Tests (choose the most symptomatic from above) No pain

| Baseline symptoms                                  | Symptoms response                                                | After Movement –<br>Better, Worse, NB, NW, NE | Mechanical Response |      |           |
|----------------------------------------------------|------------------------------------------------------------------|-----------------------------------------------|---------------------|------|-----------|
|                                                    |                                                                  |                                               | ↑ROM                | ↓ROM | No Effect |
| Active movement, passive movement, resisted test   | During Movement –<br>Produce, Abolish,<br>Increase, Decrease, NE |                                               |                     |      |           |
| Hip all movements in lying                         | No effect                                                        |                                               |                     |      | <u>√</u>  |
| Knee all movements                                 | No effect                                                        |                                               |                     |      | <u>√</u>  |
| Resisted knee flexion                              | Produced                                                         | NW                                            |                     |      | <u>√</u>  |
|                                                    |                                                                  |                                               |                     |      |           |
|                                                    |                                                                  |                                               |                     |      |           |
| Effect of static positioning                       |                                                                  |                                               |                     |      |           |
|                                                    |                                                                  |                                               |                     |      |           |
| Other tests: eg loaded, compression, unloaded etc. |                                                                  |                                               |                     |      |           |
|                                                    |                                                                  |                                               |                     |      |           |

SPINE

Movement Loss None

Effect of repeated movements No effect

Effect of static positioning \_\_\_\_\_

Spine testing Not relevant / relevant / secondary

PROVISIONAL CLASSIFICATION Peripheral \_\_\_\_\_ Spine \_\_\_\_\_

Dysfunction – Articular \_\_\_\_\_ Contractile \_\_\_\_\_

Derangement \_\_\_\_\_ Postural \_\_\_\_\_

Other \_\_\_\_\_ Uncertain \_\_\_\_\_

PRINCIPLE OF MANAGEMENT

Education \_\_\_\_\_

Exercise \_\_\_\_\_ Frequency \_\_\_\_\_

Treatment Goals \_\_\_\_\_

Date \_\_\_\_\_  
 Name 19 Sex F  
 Address \_\_\_\_\_  
 Telephone \_\_\_\_\_  
 Date of Birth \_\_\_\_\_ Age 60  
 Referral: GP / Orth / **Self** / Other  
 Work Office work  
 Leisure Golf  
 Postures / Stresses Sitting, walking  
 Functional Disability from present episode Slightly less active  
 Functional Disability score \_\_\_\_\_  
 VAS Score (0-10) 4

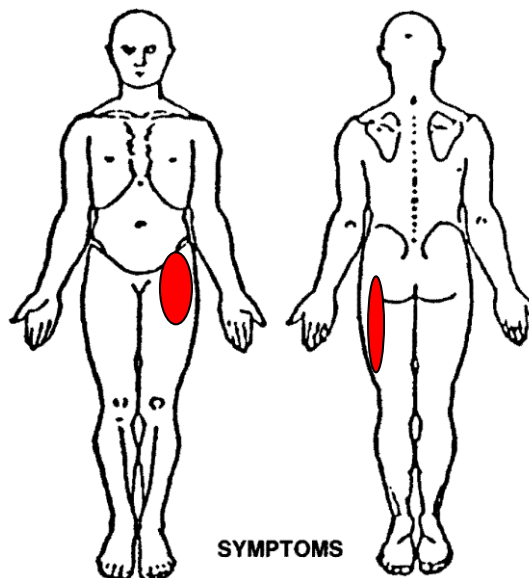

HISTORY

Present Symptoms Left anterior and lateral thigh  
 Present since 10 months *Improving / **Unchanging** / Worsening*  
 Commenced as a result of \_\_\_\_\_ **no apparent reason**  
 Symptoms at onset: Left anterior thigh  
 Constant symptoms: \_\_\_\_\_ Intermittent symptoms: Left anterior / lateral thigh  
 What produces or worsens Walking, standing  
 \_\_\_\_\_  
 What stops or reduces Sitting

Continued use makes the pain Better **Worse** No Effect

Pain at rest Yes / **No**

Disturbed night Yes / **No**

Other Questions \_\_\_\_\_  
 \_\_\_\_\_

Treatments this episode None

Previous episodes None

Previous treatments None

Spinal history LBP - many episodes

Paraesthesia Yes / **No**

Medications tried None Effect \_\_\_\_\_

Present medication None

General health Good

Imaging None

Summary: Acute / Sub-acute / **Chronic** Trauma / **Insidious onset**

Sites for physical examination Hip, lumbar spine

EXAMINATION

Observation Poor posture

Baseline measurements (pain or functional activity) None

| Active Movements (note symptoms and range)                      | PDM | ERP |
|-----------------------------------------------------------------|-----|-----|
| <u>Flexion - reduced ROM, produced pain</u>                     |     | √   |
| _____                                                           |     |     |
| _____                                                           |     |     |
| Passive Movement (+/- over pressure) (note symptoms and range): |     |     |
| <u>Flexion, medial rotation - reduced ROM, produced pain</u>    |     | √   |
| <u>Extension - produced pain</u>                                |     | √   |
| _____                                                           |     |     |
| Resisted Test Response (pain)                                   |     |     |
| <u>Hip movements - no effect</u>                                |     |     |
| _____                                                           |     |     |
| _____                                                           |     |     |

Repeated Tests (choose the most symptomatic from above)

| Baseline symptoms                                  | Symptoms response                                          |                                            | Mechanical Response |      |           |
|----------------------------------------------------|------------------------------------------------------------|--------------------------------------------|---------------------|------|-----------|
|                                                    | During Movement – Produce, Abolish, Increase, Decrease, NE | After Movement – Better, Worse, NB, NW, NE | ↑ROM                | ↓ROM | No Effect |
| Active movement, passive movement, resisted test   |                                                            |                                            |                     |      |           |
| Hip flexion                                        | produced                                                   | NW                                         |                     |      | √         |
| Hip medial rotation                                | produced                                                   | NW                                         |                     |      | √         |
| Hip extension                                      | produced                                                   | NW                                         |                     |      | √         |
| _____                                              |                                                            |                                            |                     |      |           |
| _____                                              |                                                            |                                            |                     |      |           |
| Effect of static positioning                       |                                                            |                                            |                     |      |           |
| _____                                              |                                                            |                                            |                     |      |           |
| Other tests: eg loaded, compression, unloaded etc. |                                                            |                                            |                     |      |           |
| _____                                              |                                                            |                                            |                     |      |           |
| _____                                              |                                                            |                                            |                     |      |           |

SPINE

Movement Loss None

Effect of repeated movements No effect

Effect of static positioning \_\_\_\_\_

Spine testing Not relevant / relevant / secondary problem

|                                             |                   |
|---------------------------------------------|-------------------|
| PROVISIONAL CLASSIFICATION Peripheral _____ | Spine _____       |
| Dysfunction – Articular _____               | Contractile _____ |
| Derangement _____                           | Postural _____    |
| Other _____                                 | Uncertain _____   |

PRINCIPLE OF MANAGEMENT

Education \_\_\_\_\_

Exercise \_\_\_\_\_ Frequency \_\_\_\_\_

Treatment Goals \_\_\_\_\_

\_\_\_\_\_

Date \_\_\_\_\_  
 Name 20 Sex M  
 Address \_\_\_\_\_  
 Telephone \_\_\_\_\_  
 Date of Birth \_\_\_\_\_ Age 25  
 Referral: GP / Orth / **Self** / Other  
 Work Student  
 Leisure Squash, archery  
 Postures / Stresses Sitting  
 Functional Disability from present episode Stopped sport  
 Functional Disability score \_\_\_\_\_  
 VAS Score (0-10) 5-7

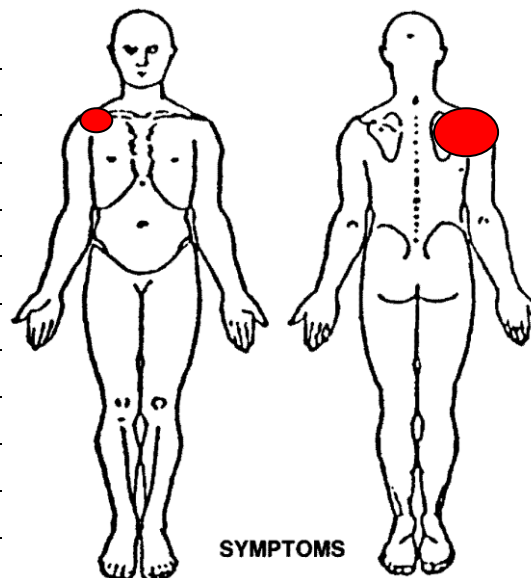

HISTORY

Present Symptoms Right shoulder and scapular pain  
 Present since 4 months Improving / **Unchanging** / Worsening  
 Commenced as a result of Archery or no apparent reason  
 Symptoms at onset: Right shoulder and scapular pain  
 Constant symptoms: \_\_\_\_\_ Intermittent symptoms: Right shoulder and scapular pain  
 What produces or worsens Abduction arm, hand behind back, looking over right shoulder  
 What stops or reduces Avoiding aggravating movements

Continued use makes the pain Better Worse No Effect

Pain at rest Yes / No

Disturbed night Yes / No

Other Questions \_\_\_\_\_

Treatments this episode Ice shoulder self-management

Previous episodes Many episodes over last 4 years, sometimes spontaneously resolves after 2-3 months

Previous treatments Exercises, mobilisation, machines on shoulder - gradually resolves over 2-3 months

Spinal history Not sure

Paraesthesia Yes / No

Medications tried Various Effect No effect

Present medication Paracetamol sometimes

General health Good

Imaging Neck and shoulder x-ray - NAD

Summary: Acute / Sub-acute / **Chronic** Trauma / **Insidious onset?**

Sites for physical examination Neck, shoulder

**EXAMINATION**

Observation Poor posture, shoulder protracted

Baseline measurements (pain or functional activity) None

| Active Movements (note symptoms and range)                      | PDM | ERP |
|-----------------------------------------------------------------|-----|-----|
| <u>All shoulder movements produced pain, no loss ROM</u>        |     | √   |
|                                                                 |     |     |
|                                                                 |     |     |
|                                                                 |     |     |
| Passive Movement (+/- over pressure) (note symptoms and range): |     |     |
| <u>No effect</u>                                                |     |     |
|                                                                 |     |     |
|                                                                 |     |     |
| Resisted Test Response (pain)                                   |     |     |
| <u>No effect</u>                                                |     |     |
|                                                                 |     |     |
|                                                                 |     |     |

Repeated Tests (choose the most symptomatic from above)

| Baseline symptoms                                  | Symptoms response                                                |                                               | Mechanical Response |      |           |
|----------------------------------------------------|------------------------------------------------------------------|-----------------------------------------------|---------------------|------|-----------|
|                                                    | During Movement –<br>Produce, Abolish,<br>Increase, Decrease, NE | After Movement –<br>Better, Worse, NB, NW, NE | ↑ROM                | ↓ROM | No Effect |
| Active movement, passive movement, resisted test   |                                                                  |                                               |                     |      |           |
| All shoulder movements                             | Produce                                                          | NW                                            |                     |      | √         |
|                                                    |                                                                  |                                               |                     |      |           |
|                                                    |                                                                  |                                               |                     |      |           |
|                                                    |                                                                  |                                               |                     |      |           |
| Effect of static positioning                       |                                                                  |                                               |                     |      |           |
|                                                    |                                                                  |                                               |                     |      |           |
| Other tests: eg loaded, compression, unloaded etc. |                                                                  |                                               |                     |      |           |
|                                                    |                                                                  |                                               |                     |      |           |

**SPINE**

Movement Loss Retraction, extension - reduced ROM

Effect of repeated movements Retraction with OP produced, decreased, better; increased ROM

Effect of static positioning \_\_\_\_\_

Spine testing Not relevant / relevant / secondary problem

|                            |            |                   |
|----------------------------|------------|-------------------|
| PROVISIONAL CLASSIFICATION | Peripheral | Spine             |
| Dysfunction – Articular    | _____      | Contractile _____ |
| Derangement                | _____      | Postural _____    |
| Other                      | _____      | Uncertain _____   |

**PRINCIPLE OF MANAGEMENT**

Education \_\_\_\_\_

Exercise \_\_\_\_\_ Frequency \_\_\_\_\_

Treatment Goals \_\_\_\_\_



Date \_\_\_\_\_  
 Name 21 Sex F  
 Address \_\_\_\_\_  
 Telephone \_\_\_\_\_  
 Date of Birth \_\_\_\_\_ Age 53  
 Referral: GP / Orth / **Self** / Other  
 Work Retired  
 Leisure Golf  
 Postures / Stresses Sitting, golf 3 x a week  
 Functional Disability from present episode Stopped golf  
 Functional Disability score \_\_\_\_\_  
 VAS Score (0-10) 7

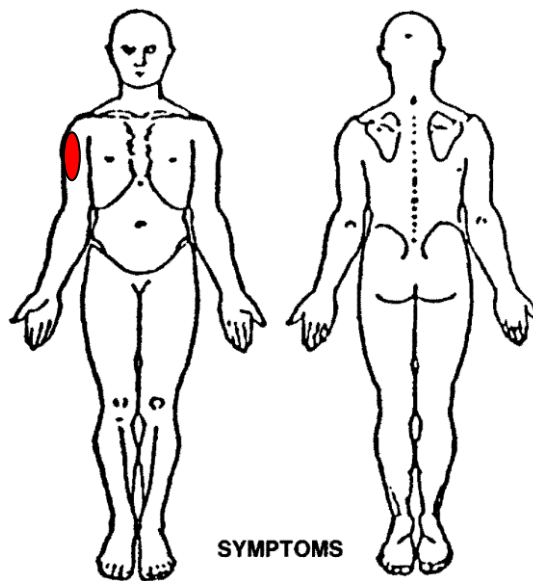

HISTORY

Present Symptoms Right arm pain  
 Present since \_\_\_\_\_ *Improving / **Unchanging** / Worsening*  
 Commenced as a result of Turning over in bed? *or no apparent reason*  
 Symptoms at onset: Right arm pain  
 Constant symptoms: \_\_\_\_\_ Intermittent symptoms: Right arm pain  
 What produces or worsens Arm movements, golf  
 \_\_\_\_\_  
 What stops or reduces Rest, ice

Continued use makes the pain Better **Worse** No Effect

Pain at rest Yes / **No**

Disturbed night **Yes** / No

Other Questions \_\_\_\_\_  
 \_\_\_\_\_  
 \_\_\_\_\_

Treatments this episode None

Previous episodes None

Previous treatments None

Spinal history None

Paraesthesia Yes / **No**

Medications tried NSAID cream Effect No effect

Present medication None

General health Good

Imaging No

Summary: Acute / **Sub-acute** / Chronic **Trauma** ?/ Insidious onset

Sites for physical examination Shoulder, neck

EXAMINATION

Observation Cradles arm

Baseline measurements (pain or functional activity) No pain

| Active Movements (note symptoms and range)                                   | PDM | ERP |
|------------------------------------------------------------------------------|-----|-----|
| Shoulder flexion and abduction - produced pain                               | √   |     |
| Shoulder medial rotation - reduced ROM, produced pain                        | √   |     |
| Elbow flexion - produced pain                                                | √   |     |
| Passive Movement (+/- over pressure) (note symptoms and range):<br>No effect |     |     |
| Resisted Test Response (pain)<br>Shoulder flexion - produced pain ++         |     |     |
| Elbow flexion - produced pain ++                                             |     |     |

Repeated Tests (choose the most symptomatic from above) No pain

| Baseline symptoms                                  | Symptoms response                                                | After Movement –<br>Better, Worse, NB, NW, NE | Mechanical Response |      |           |
|----------------------------------------------------|------------------------------------------------------------------|-----------------------------------------------|---------------------|------|-----------|
|                                                    |                                                                  |                                               | ↑ROM                | ↓ROM | No Effect |
| Active movement, passive movement, resisted test   | During Movement –<br>Produce, Abolish,<br>Increase, Decrease, NE |                                               |                     |      |           |
| Shoulder flexion                                   | produced                                                         | NW                                            |                     |      | √         |
| Shoulder abduction                                 | produced                                                         | NW                                            |                     |      | √         |
| Shoulder medial rotation                           | produced                                                         | NW                                            |                     |      | √         |
| Resisted shoulder and elbow flexion                | produced ++                                                      | NW                                            |                     |      | √         |
| Effect of static positioning                       |                                                                  |                                               |                     |      |           |
| Other tests: eg loaded, compression, unloaded etc. |                                                                  |                                               |                     |      |           |

SPINE

Movement Loss None

Effect of repeated movements No effect

Effect of static positioning \_\_\_\_\_

Spine testing *Not relevant / relevant / secondary problem* \_\_\_\_\_

| PROVISIONAL CLASSIFICATION | Peripheral | Spine             |
|----------------------------|------------|-------------------|
| Dysfunction – Articular    | _____      | Contractile _____ |
| Derangement                | _____      | Postural _____    |
| Other                      | _____      | Uncertain _____   |

PRINCIPLE OF MANAGEMENT

Education \_\_\_\_\_

Exercise \_\_\_\_\_ Frequency \_\_\_\_\_

Treatment Goals \_\_\_\_\_

Date \_\_\_\_\_  
 Name 22 Sex F  
 Address \_\_\_\_\_  
 Telephone \_\_\_\_\_  
 Date of Birth 32  
 Referral: GP / Orth / Self / Other  
 Work Post-woman  
 Leisure Golf  
 Postures / Stresses Walks a lot  
 Functional Disability from present episode Affected golf  
 Functional Disability score \_\_\_\_\_  
 VAS Score (0-10) 3

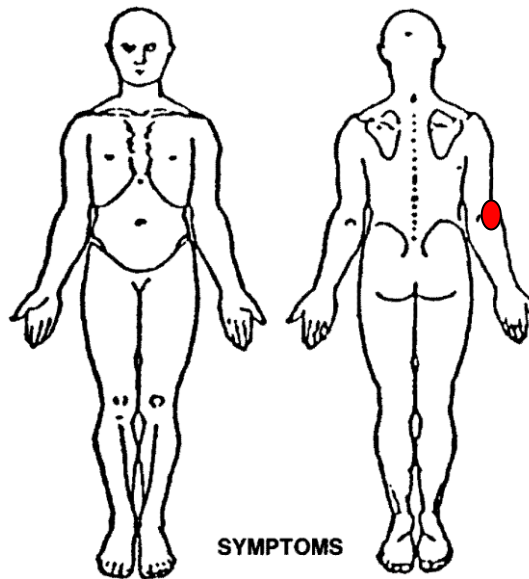

HISTORY

Present Symptoms Right elbow pain  
 Present since 4 months *Improving / **Unchanging** / Worsening*  
 Commenced as a result of Fell onto outstretched hand *or no apparent reason*  
 Symptoms at onset: Right elbow pain  
 Constant symptoms: \_\_\_\_\_ Intermittent symptoms: Right elbow pain  
 What produces or worsens Arm activities  
 What stops or reduces Resting arm in flexed position

Continued use makes the pain Better Worse **No Effect**  
 Pain at rest Yes / **No**  
 Disturbed night Yes / **No**  
 Other Questions \_\_\_\_\_

Treatments this episode None  
 Previous episodes None  
 Previous treatments None  
 Spinal history Episodes neck pain

\_\_\_\_\_ Paraesthesia Yes / No  
 Medications tried None Effect \_\_\_\_\_

Present medication None  
 General health Good  
 Imaging X-ray NAD

Summary: Acute / Sub-acute / **Chronic** **Trauma / Insidious onset**  
 Sites for physical examination Elbow

EXAMINATION

Observation \_\_\_\_\_

Baseline measurements (pain or functional activity) No pain

| Active Movements (note symptoms and range)                      | PDM | ERP |
|-----------------------------------------------------------------|-----|-----|
| Elbow flexion - full ROM, no pain                               |     |     |
| Elbow extension - minor loss ROM, pain                          |     | √   |
| Passive Movement (+/- over pressure) (note symptoms and range): |     |     |
| Elbow flexion - full ROM, no pain                               |     |     |
| Elbow extension - minor loss ROM, pain                          |     | √   |
| Resisted Test Response (pain)                                   |     |     |
| NAD                                                             |     |     |

Repeated Tests (choose the most symptomatic from above)

| Baseline symptoms                                  | Symptoms response                                          |                                            | Mechanical Response |      |           |
|----------------------------------------------------|------------------------------------------------------------|--------------------------------------------|---------------------|------|-----------|
|                                                    | During Movement – Produce, Abolish, Increase, Decrease, NE | After Movement – Better, Worse, NB, NW, NE | ↑ROM                | ↓ROM | No Effect |
| Active movement, passive movement, resisted test   |                                                            |                                            |                     |      |           |
| Extension                                          | produced                                                   | NW                                         |                     |      | √         |
| Flexion                                            | NE                                                         | NE                                         |                     |      | √         |
| Effect of static positioning                       |                                                            |                                            |                     |      |           |
| Other tests: eg loaded, compression, unloaded etc. |                                                            |                                            |                     |      |           |

SPINE

Movement Loss \_\_\_\_\_

Effect of repeated movements Not tested

Effect of static positioning \_\_\_\_\_

Spine testing *Not relevant / relevant / secondary problem* \_\_\_\_\_

|                                       |                   |
|---------------------------------------|-------------------|
| PROVISIONAL CLASSIFICATION Peripheral | Spine             |
| Dysfunction – Articular _____         | Contractile _____ |
| Derangement _____                     | Postural _____    |
| Other _____                           | Uncertain _____   |

PRINCIPLE OF MANAGEMENT

Education \_\_\_\_\_

Exercise \_\_\_\_\_ Frequency \_\_\_\_\_

Treatment Goals \_\_\_\_\_

Date \_\_\_\_\_  
 Name 23 Sex M  
 Address \_\_\_\_\_  
 Telephone \_\_\_\_\_  
 Date of Birth \_\_\_\_\_ Age 64  
 Referral: GP / Orth / Self / Other  
 Work Retired  
 Leisure Walks  
 Postures / Stresses \_\_\_\_\_  
 Functional Disability from present episode Reaching activities  
 Functional Disability score \_\_\_\_\_  
 VAS Score (0-10) 4-6

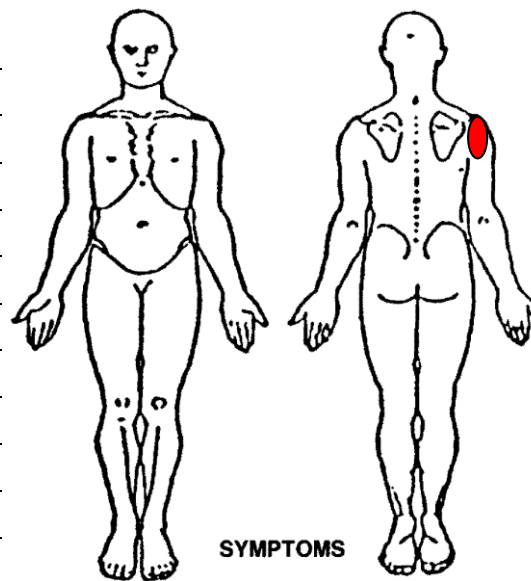

SYMPTOMS

HISTORY

Present Symptoms Right shoulder pain  
 Present since 8 months *Improving / **Unchanging** / Worsening*  
 Commenced as a result of \_\_\_\_\_ no apparent reason  
 Symptoms at onset: Right shoulder  
 Constant symptoms: \_\_\_\_\_ Intermittent symptoms: Right shoulder pain  
 What produces or worsens Hand behind back, reaching up or out to side  
 \_\_\_\_\_  
 What stops or reduces Arm at rest or mid-range

Continued use makes the pain Better Worse No Effect  
 Pain at rest Yes / No  
 Disturbed night Yes / No Occasionally  
 Other Questions Was much worse initially then got easier, but no change last few months

Treatments this episode Ultrasound, mobilisations - has not been much help  
 Previous episodes None  
 Previous treatments None  
 Spinal history Episodes back and neck pain

Paraesthesia Yes / No

Medications tried NSAIDs, analgesics Effect Helped at first but not later  
 Present medication None  
 General health Good  
 Imaging None

Summary: Acute / Sub-acute / **Chronic** Trauma / **Insidious onset**  
 Sites for physical examination Shoulder

EXAMINATION

Observation \_\_\_\_\_

Baseline measurements (pain or functional activity) No pain

| Active Movements (note symptoms and range)                      | PDM | ERP |
|-----------------------------------------------------------------|-----|-----|
| Flexion and abduction 140°, produced pain                       |     | √   |
| Hand-behind-back (HBB) - to lower lumbar spine, produced pain   |     | √   |
| Lateral rotation 45°, produced pain                             |     | √   |
| Passive Movement (+/- over pressure) (note symptoms and range): |     |     |
| Flexion and abduction 140°, produced pain                       |     | √   |
| Hand-behind-back - to lower lumbar spine, produced pain         |     | √   |
| Lateral rotation 45°, produced pain                             |     | √   |
| Resisted Test Response (pain)                                   |     |     |
| No effect                                                       |     |     |
|                                                                 |     |     |
|                                                                 |     |     |

Repeated Tests (choose the most symptomatic from above)

| Baseline symptoms                                  | Symptoms response                                                |                                               | Mechanical Response |      |           |
|----------------------------------------------------|------------------------------------------------------------------|-----------------------------------------------|---------------------|------|-----------|
|                                                    | During Movement –<br>Produce, Abolish,<br>Increase, Decrease, NE | After Movement –<br>Better, Worse, NB, NW, NE | ↑ROM                | ↓ROM | No Effect |
| Active movement, passive movement, resisted test   |                                                                  |                                               |                     |      |           |
| Flexion                                            | produced                                                         | NW                                            |                     |      | √         |
| HBB                                                | produced                                                         | NW                                            |                     |      | √         |
| Lateral rotation                                   | produced                                                         | NW                                            |                     |      | √         |
|                                                    |                                                                  |                                               |                     |      |           |
|                                                    |                                                                  |                                               |                     |      |           |
| Effect of static positioning                       |                                                                  |                                               |                     |      |           |
|                                                    |                                                                  |                                               |                     |      |           |
| Other tests: eg loaded, compression, unloaded etc. |                                                                  |                                               |                     |      |           |
|                                                    |                                                                  |                                               |                     |      |           |

SPINE

Movement Loss \_\_\_\_\_

Effect of repeated movements Tested NE

Effect of static positioning \_\_\_\_\_

Spine testing *Not relevant / relevant / secondary* \_\_\_\_\_

PROVISIONAL CLASSIFICATION Peripheral \_\_\_\_\_ Spine \_\_\_\_\_

Dysfunction – Articular \_\_\_\_\_ Contractile \_\_\_\_\_

Derangement \_\_\_\_\_ Postural \_\_\_\_\_

Other \_\_\_\_\_ Uncertain \_\_\_\_\_

PRINCIPLE OF MANAGEMENT

Education \_\_\_\_\_

Exercise \_\_\_\_\_ Frequency \_\_\_\_\_

Treatment Goals \_\_\_\_\_

\_\_\_\_\_

Date \_\_\_\_\_  
 Name 24 Sex M  
 Address \_\_\_\_\_  
 Telephone \_\_\_\_\_  
 Date of Birth \_\_\_\_\_ Age 34  
 Referral: *GP / Orth / **Self** / Other* \_\_\_\_\_  
 Work Builder  
 Leisure Darts  
 Postures / Stresses Heavy labour  
 Functional Disability from present episode Still working  
 Functional Disability score \_\_\_\_\_  
 VAS Score (0-10) 2-5

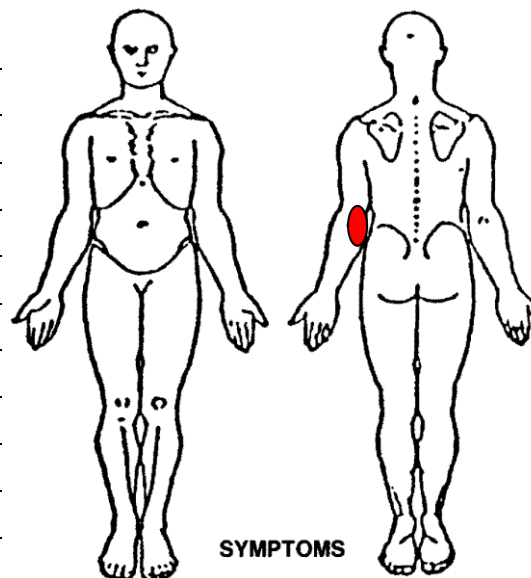

HISTORY

Present Symptoms Left elbow pain  
 Present since 4 months *Improving / Unchanging / **Worsening***  
 Commenced as a result of \_\_\_\_\_ ***no apparent reason***  
 Symptoms at onset: Left elbow pain  
 Constant symptoms: \_\_\_\_\_ Intermittent symptoms: Left elbow pain  
 What produces or worsens Arm activity, especially lifting and carrying  
 \_\_\_\_\_  
 What stops or reduces Resting arm in mid range

Continued use makes the pain Better **Worse** No Effect  
 Pain at rest **Yes** / No *Sometimes after lot of lifting*  
 Disturbed night *Yes* / **No**  
 Other Questions Over 4 months symptoms come and go but overall getting worse (lasting longer, coming on more easily)

Treatments this episode None  
 Previous episodes None  
 Previous treatments None  
 Spinal history Occasional brief episodes neck and back pain

Paraesthesia Yes / No

Medications tried NSAID Effect No effect  
 Present medication None  
 General health Good  
 Imaging None

Summary: *Acute / Sub-acute / **Chronic*** *Trauma / **Insidious onset***  
 Sites for physical examination Elbow

EXAMINATION

Observation NAD

Baseline measurements (pain or functional activity) Slight ache

| Active Movements (note symptoms and range)                      | PDM | ERP |
|-----------------------------------------------------------------|-----|-----|
| Flexion - limited ROM, increased pain                           | √   |     |
| Extension - limited ROM, increased pain                         |     | √   |
| Passive Movement (+/- over pressure) (note symptoms and range): |     |     |
| Flexion - limited ROM, increased pain                           | √   |     |
| Extension - limited ROM, increased pain                         |     | √   |
| Resisted Test Response (pain)                                   |     |     |
| No effect                                                       |     |     |

Repeated Tests (choose the most symptomatic from above)

| Baseline symptoms                                  | Symptoms response                                          |                                            | Mechanical Response |      |           |
|----------------------------------------------------|------------------------------------------------------------|--------------------------------------------|---------------------|------|-----------|
|                                                    | During Movement – Produce, Abolish, Increase, Decrease, NE | After Movement – Better, Worse, NB, NW, NE | ↑ROM                | ↓ROM | No Effect |
| Active movement, passive movement, resisted test   |                                                            |                                            |                     |      |           |
| Extension                                          | increase                                                   | Worse                                      |                     | √    |           |
| Flexion                                            | decrease                                                   | Better                                     | √                   |      |           |
| Effect of static positioning                       |                                                            |                                            |                     |      |           |
| Other tests: eg loaded, compression, unloaded etc. |                                                            |                                            |                     |      |           |

SPINE

Movement Loss \_\_\_\_\_

Effect of repeated movements Tested NE

Effect of static positioning \_\_\_\_\_

Spine testing *Not relevant / relevant / secondary problem* \_\_\_\_\_

| PROVISIONAL CLASSIFICATION | Peripheral | Spine             |
|----------------------------|------------|-------------------|
| Dysfunction – Articular    | _____      | Contractile _____ |
| Derangement                | _____      | Postural _____    |
| Other                      | _____      | Uncertain _____   |

PRINCIPLE OF MANAGEMENT

Education \_\_\_\_\_

Exercise \_\_\_\_\_ Frequency \_\_\_\_\_

Treatment Goals \_\_\_\_\_



Date \_\_\_\_\_  
 Name 25 Sex F  
 Address \_\_\_\_\_  
 Telephone \_\_\_\_\_  
 Date of Birth \_\_\_\_\_ Age 38  
 Referral: GP / Orth / Self / Other \_\_\_\_\_  
 Work Secretary  
 Leisure Young children  
 Postures / Stresses Sitting  
 Functional Disability from present episode Reduced activity  
 Functional Disability score \_\_\_\_\_  
 VAS Score (0-10) 3

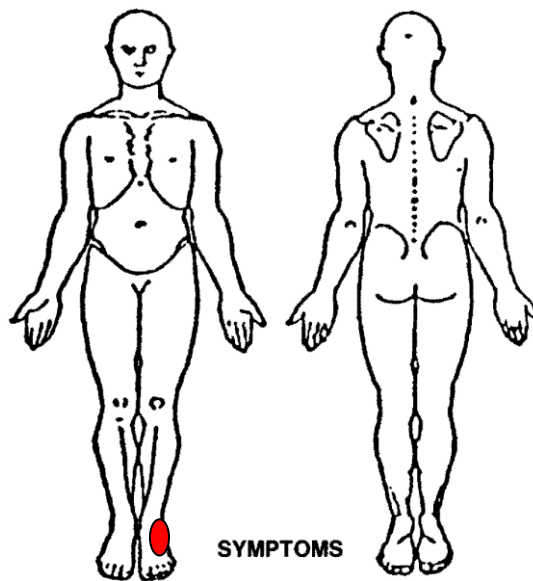

HISTORY

Present Symptoms Left ankle pain  
 Present since 3 months *Improving / Unchanging / Worsening*  
 Commenced as a result of Slipping off kerb *or no apparent reason*  
 Symptoms at onset: Left ankle pain, swelling and discoloured  
 Constant symptoms: \_\_\_\_\_ Intermittent symptoms: Left ankle pain  
 What produces or worsens Walking a lot, twisting ankle, pointing toes away  
 \_\_\_\_\_  
 What stops or reduces Rest non-weight-bearing

Continued use makes the pain Better Worse No Effect (mostly)  
 Pain at rest Yes / No  
 Disturbed night Yes / No  
 Other Questions \_\_\_\_\_

Treatments this episode Ice, ultrasound, mobilisations - was getting better, but now stopped improving  
 Previous episodes None  
 Previous treatments None  
 Spinal history None

Paraesthesia Yes / No

Medications tried NSAID Effect Helped initially  
 Present medication None  
 General health Good  
 Imaging X-ray - NAD  
 Summary: Acute / Sub-acute / **Chronic** **Trauma** / Insidious onset  
 Sites for physical examination Ankle

EXAMINATION

Observation NAD

Baseline measurements (pain or functional activity) No pain

| Active Movements (note symptoms and range)                      | PDM | ERP |
|-----------------------------------------------------------------|-----|-----|
| Plantarflexion - produced pain                                  |     | √   |
| Inversion - reduced ROM, produced pain                          |     | √   |
| Passive Movement (+/- over pressure) (note symptoms and range): |     |     |
| Plantarflexion - produced pain                                  |     | √   |
| Inversion - reduced ROM, produced pain                          |     | √   |
| Resisted Test Response (pain)                                   |     |     |
| No effect                                                       |     |     |

Repeated Tests (choose the most symptomatic from above)

| Baseline symptoms                                  | Symptoms response                                          |                                            | Mechanical Response |      |           |
|----------------------------------------------------|------------------------------------------------------------|--------------------------------------------|---------------------|------|-----------|
|                                                    | During Movement – Produce, Abolish, Increase, Decrease, NE | After Movement – Better, Worse, NB, NW, NE | ↑ROM                | ↓ROM | No Effect |
| Active movement, passive movement, resisted test   |                                                            |                                            |                     |      |           |
| Plantarflexion                                     | Produce                                                    | NW                                         |                     |      | √         |
| Inversion                                          | Produce                                                    | NW                                         |                     |      | √         |
| Effect of static positioning                       |                                                            |                                            |                     |      |           |
| Other tests: eg loaded, compression, unloaded etc. |                                                            |                                            |                     |      |           |

SPINE

Movement Loss \_\_\_\_\_

Effect of repeated movements Not tested

Effect of static positioning \_\_\_\_\_

Spine testing *Not relevant / relevant / secondary problem* \_\_\_\_\_

|                                       |                   |
|---------------------------------------|-------------------|
| PROVISIONAL CLASSIFICATION Peripheral | Spine             |
| Dysfunction – Articular _____         | Contractile _____ |
| Derangement _____                     | Postural _____    |
| Other _____                           | Uncertain _____   |

PRINCIPLE OF MANAGEMENT

Education \_\_\_\_\_

Exercise \_\_\_\_\_ Frequency \_\_\_\_\_

Treatment Goals \_\_\_\_\_
